1

2

3

4 Evaluation method of ecosystem service value under complex  
5 ecological environment: A case study of Gansu Province, China

6 Short title: Evaluation method of ecosystem service value

7 Xiaojiong Zhao<sup>1, 2, 3¶</sup>, Jian Wang<sup>1\*¶</sup>, Junde Su<sup>4&</sup>, Wei Sun<sup>3&</sup>

8

9

10

11 <sup>1</sup> Northwest Institute of Eco-Environment and Resources, Chinese Academy of Sciences, Lanzhou, China

12 <sup>2</sup> University of Chinese Academy of Sciences, Beijing, China

13 <sup>3</sup> Gansu Academy of Eco-environmental Sciences, Lanzhou, China

14 <sup>4</sup> Gansu Vocational & Technical College of Nonferrous Metallurgy, Jinchang, China

15

16

17 <sup>1</sup> Corresponding author

18 E-mail: [wjian@lzb.ac.cn](mailto:wjian@lzb.ac.cn)(J. Wang)

19

20

21 <sup>¶</sup> These authors contributed equally to this work.

22 <sup>&</sup> These authors also contributed equally to this work.

23

## 1 **Abstract**

2           Scientific assessment of regional ecosystem service value (ESV) is helpful to make  
3 scientific ecological protection plan and compensation policy. The evaluation method has not been  
4 established that is adapted to the complex and diverse characteristics of the ecological  
5 environment. This paper takes Gansu Province as an example, on the basis of fully considering the  
6 regional differences of ecosystem service function, the five correction index of value equivalent  
7 factor per unit area were constructed in the provincial scale, and the regional difference  
8 adjustment index of 11 kinds of ES was constructed in regional scale, in the way, the value  
9 evaluation model based on regional difference was established. The results show that in 2015, the  
10 total ESV reached 2239.555 billion Yuan in Gansu Province, ESV gradually increased from the  
11 northeast to the southwest, and the high-value areas of service function located in Qilian Mountain  
12 and Longnan Mountain, of which the forest and grassland ecosystem contributed the most to the  
13 value. From the perspective of value composition, local climate regulation and biodiversity  
14 maintenance function are the main service functions of Gansu Province. From 2000 to 2015, ESV  
15 increased by 3.426 billion Yuan in Gansu Province, the value of forest and urban ecosystem  
16 continued increasing, while the value of cultivated land ecosystem continue decreasing. From the  
17 spatial characteristics of service value change, the area of value reduction gradually moved from  
18 the central part of Gansu Province to the surrounding area. In general, although this study needs  
19 further improvement, the constructed evaluation method provides a relatively comprehensive  
20 evaluation scheme for the spatiotemporal dynamic evaluation of ESV in Gansu Province. This  
21 study provided a more overall research idea for the evaluation of ESV under complex ecological  
22 environment.

## 23 **Introduction**

24 Ecosystems can not only provide various raw materials or products directly for human  
25 survival, but also have functions such as regulating climate, purifying pollution, conserving water  
26 sources, maintaining water and soil, preventing wind and sand, reducing disasters, and protecting  
27 biodiversity. All ecosystem products and services are collectively referred to as ecosystem  
28 services (ES) [1,2].The evaluation of ecosystem service value (ESV) is the basis of regional  
29 ecological construction, ecological protection, ecological work division and ecological  
30 decision-making of natural assets, which has become a research hotspot of Ecology[3-5].Since  
31 Costanza first accounted for the value of global ES in 1997, the ESV calculation has been  
32 gradually used as the core basis of ecological asset accounting, thus helping the spatial cognition  
33 and sustainable management of the state system in a more intuitive way[5,6]. However, due to the  
34 different parameter choices of different scholars, the evaluation results of the same ecosystem  
35 services may vary greatly, and there is a lack of comparability between the ESV obtained by  
36 different pricing methods, while the mature pricing method of ESV has not yet been formed  
37 internationally [7-10].

38 At present, the research on the evaluation method of ESV can be roughly divided into two  
39 categories: (1) A method based on the service function price per unit area. This method evaluates  
40 some key service functions by means of a series of ecological equations, such as food production,  
41 soil and water conservation, carbon and oxygen production, and habitat quality [11-14].The  
42 functional value method can accurately measure the size of some service functions in the region.  
43 However, for different service functions, different ecological equations and parameter inputs are  
44 often required, and the calculation process is more complicated [3]. Therefore, this method is

45 mostly applied on a small scale, the implementation cost is large. In addition, when using this  
46 method for evaluation, scholars often lack the consideration of the ecological background of the  
47 study area. Moreover, there is no standard in choosing which service functions to be evaluated  
48 [15]. These drawbacks bring huge uncertainty to the evaluating results and limitations on results  
49 comparison. (2) A method based on value equivalent factor per unit area. This method was first  
50 proposed by Costanza et al [5]. This method divides different land ecosystems and service  
51 functions, obtaining the equivalent value based on meta-analysis and the area of each ecosystem to  
52 get the regional ESV. Compared with the functional value method, this method evaluate ESV  
53 more effectively on a large scale [16], and is widely used in research [3,5,17-19].

54 However, scholars have found that the evaluation results of the equivalent factor method are  
55 valid and reliable only when the equivalent factor accurately reflects the ecological background in  
56 the study area[16,20,21]. The equivalent factor proposed by Costanza et al.[5, 17] is aimed at  
57 global-scale value assessment, which is not consistent with the real ecological situation in China  
58 Xie et al.[18,19] conducted a questionnaire survey on Chinese ecologists, and put forward an  
59 equivalent factor table of ES for China in 2003 and 2008.In 2015, Xie et al.[3] updated and  
60 improved the equivalent factor table by combining various literatures and regional biomass, which  
61 is also the most scientific and systematic equivalent factor table in China. The equivalent factor  
62 table proposed by Xie et al.[3] essentially reflects the average level of the national ecosystem  
63 service function. At present, a large number of studies [14] showed that the strength of the  
64 different service function is affected by different ecological processes and conditions, for instance,  
65 organic matter production, gas regulation and nutrient cycling function [12] are closely related to  
66 net primary productivity (NPP); water supply and regulation function are closely related to rainfall

67 [22], soil erosion [23], habitat quality [13] and accessibility of recreational site [24]. Therefore,  
68 when the equivalent factor method is used to evaluate the ecological value of a region,  
69 corresponding spatial correction of equivalent factor is needed [8,25]. At present, scholars only  
70 use biomass or NPP to modify all types of service functions [3,18,19,26], which obviously does  
71 not match the real situation. Xie et al. [18] for the first time selected other ecological indicators  
72 (rainfall and soil retention) besides NPP to modify the service function.

73 Gansu Province is located in the northwestern inland in China. It is located at the intersection  
74 of the three major plateaus of the Loess Plateau, Qinghai-Tibet Plateau, Inner Mongolia Plateau  
75 and the arid regions of Northwest China, the Qinghai-Tibet Alpine Region, and the eastern  
76 monsoon region. Its special geographical location and natural conditions form a more distinct  
77 ecological structure. The types of ecosystems are complex and diverse in this region, covering  
78 forests, grasslands, deserts, wetlands, farmland, cities and other six continent ecosystems. The  
79 diversity of ecosystem types has caused significant regional differences. However, the current  
80 researches mostly focus on single or several ecosystems, and only investigate the several  
81 ecosystem service functions on the ESV in Gansu Province, such as forests[27-29],  
82 grassland[30,31], cultivated land[32]. Considering such complex ecological environment  
83 characteristics in Gansu Province, previous study has not investigate the ESV for the regional  
84 differences in space, and no value evaluation method has been established according with the  
85 ecological environment in the region.

86 This study takes into account the regional differences and the simplicity of the equivalent  
87 factor method. In view of the application of the equivalent factors of various ecosystems on a  
88 large scale, it is necessary to closely relate the equivalent factors with the national large scale and

89 to the actual situation of Gansu Province. Based on a more refined classification of the ecosystem  
90 types in Gansu Province, the study added some ecosystem equivalent factors, constructed a  
91 revised index, and revised the equivalent factors studied by Xie et al.[3] to form an equivalent  
92 factor table that was suitable for assessment of ESV in Gansu Province. We constructed 11  
93 regional differential adjustment indexes and readjusted the value of different service functions.  
94 Finally, we constructed a regional differential value evaluation model to evaluate the change of  
95 ESV in Gansu Province from 2000 to 2015. Considering the increasingly severe shortage and  
96 overuse of ecological services in region, the results of this study can provide scientific basis and  
97 decision support for local governments to make relatively complete ecological compensation  
98 policies.

## 99 **Materials and Methods**

### 100 **The case study**

101 The case study region is located in northwest China (Fig 1), at the intersection of three major  
102 plateaus—the Loess Plateau, the Qinghai Tibet Plateau, the Inner Mongolia Plateau—and three  
103 natural regions—the northwest arid region, the Qinghai Tibet alpine region and the eastern  
104 monsoon region. Gansu Province is a long and narrow region, covering a total land area of  
105 425,800 km<sup>2</sup>, with complex and diverse geological landforms and climate types. In addition to the  
106 marine ecosystem, there are six main land use or cover types including forests, grasslands, deserts,  
107 wetlands, farmland, and urban areas. The Gansu region is part of the Chinese "two screens and  
108 three belts" strategic ecological security barriers, which aim to maintain and protect the survival  
109 and reproduction of organisms, maintain the natural ecological balance, and guarantee people's  
110 livelihoods on the Qinghai Tibet plateau, the Sichuan-Yunnan Loess Plateau and the north sand

111 belt. It is an important water conservation and supply area in the upper reaches of the Yangtze  
112 River and the Yellow River.

113 **Fig 1. The location of the study area**

## 114 **Data source**

### 115 **The data of ecosystem type**

116 The data of ecosystem types are from the satellite application center of the ministry of  
117 ecology and environment, and the period is 2000、2005、2010 and 2015. According to the actual  
118 situation of Gansu Province and the research needs, the ecosystem types are integrated into 7  
119 primary types and 21 secondary types in the research area, and the corresponding database is  
120 established.

### 121 **Meteorological data**

122 In this study, the monthly average temperature, precipitation and sunshine hours are selected  
123 from 1981 to 2012 in Gansu Province and its surrounding meteorological stations. The data comes  
124 from Gansu Meteorological Bureau and China Meteorological science data sharing service  
125 network (<http://cdc.nmic.cn>).

### 126 **Other geographic data**

127 The annual average NPP data and the annual average water production data from 2000-2015  
128 were used in this study, which comes from the satellite application center of the Ministry of  
129 ecological environment.

### 130 **Socio-economic data**

131 The social and economic data were used in this study from 2000-2015, and come from Gansu  
132 Province Statistical Yearbook, China Statistical Yearbook and national agricultural product

133 cost-benefit data collection; the cultivated land quality data are from the annual renewal  
134 evaluation and monitoring results of cultivated land quality in Gansu Province (2017), and the  
135 grain output of each county is from Gansu Province Rural Yearbook (2000-2014); the monitoring  
136 data of atmospheric environmental quality status comes from Gansu environmental monitoring  
137 center station, with the period of 2015-2018. The monitoring data of surface water section comes  
138 from the bulletin of environmental conditions in Gansu Province and the bulletin of environmental  
139 conditions in China, with the period of 2000-2015.

## 140 **Classification of ecosystem service functions**

141 On the basis of the research results of Costanza et al. [5], de Groot et al. [33], MA [34],  
142 Burkhard et al. [35] on the classification of ES and on the characteristics of the ecosystems in  
143 Gansu, ES were divided into: ecological integrity, regulatory services, supply services, and  
144 cultural services. Because of the problem of repeatability when measuring ES for ecological  
145 integrity, this was not included in the calculation of ES value. Supply services mainly considered  
146 crops, livestock and fresh water; regulation services mainly considered local climate regulation,  
147 air quality regulation, groundwater supply, soil conservation, windbreak and sand fixation, and  
148 water purification; and cultural services mainly considered entertainment and aesthetic value.  
149 Because Gansu is rich in biodiversity and this forms an important part of the value of ecological  
150 resources, the value of biodiversity protection was also included in the value accounting.

## 151 **Improvement method of value equivalent factor per unit**

### 152 **area**

## 153 **Determination of standard equivalent factor**

154 The research year is 2000-2015 in this study , the net profit of agricultural products is



155 different in each year due to the different age, social and economic conditions and agricultural  
156 production technology. The ESV calculated only by the net profit of agricultural products in that  
157 year is not comparable. Therefore, according to the statistical information (for example, Gansu  
158 Yearbook in 2000-2015, data compilation of the second national agricultural census in Gansu  
159 Province, Gansu survey Yearbook, compilation of cost and income data of agricultural products in  
160 China), the sowing area and net profit of wheat, corn, potato and oil crops per unit area are  
161 obtained in Gansu Province from 2000 to 2015, and the average sowing proportion and average  
162 net profit are calculated. Based on this, the value of a standard equivalent factor is calculated. The  
163 calculation method is as follows:

$$164 \quad D = S_w \times F_w + S_t \times F_t + S_v \times F_v + S_x \times F_x \quad (1)$$

165 Where,  $D$  represents ESV of a standard equivalent factor ( $\text{Yuan} \cdot \text{hm}^{-1}$ );  $S_w$ ,  $S_t$ ,  $S_v$  and  $S_x$   
166 represent sowing area proportion of wheat, corn, potato and oil to the sowing area of the four  
167 crops;  $F_w$ ,  $F_t$ ,  $F_v$  and  $F_x$  represent the average net profit of wheat, corn, potato and oil crops per  
168 unit area in Gansu Province ( $\text{Yuan} \cdot \text{hm}^{-1}$ ).

## 169 **Value equivalent factor per unit area**

170 The basic value equivalent of ecosystem service function per unit area (hereinafter referred to  
171 as basic equivalent) refers to the annual average value equivalent of various service functions of  
172 different ecosystems types per unit area. Basic equivalent reflects the annual average value of  
173 different ecosystems and their various ecosystem service functions. Previous studies on  
174 equivalence factors [3,18,19] are based on the annual average value in national scale, and have a  
175 rough classification of ecosystem types, which cannot meet the needs of the refinement of  
176 ecosystem classification, nor more precisely reflect to the difference of service function among

177 ecosystem types. Therefore, in this study, the average value equivalent factor per unit area of  
178 different ecosystems is determined in Gansu Province, with reference to the following calculation  
179 process.

180 1) For the types of ecosystem and the corresponding ecosystem service types in Gansu  
181 Province, if there is such kind of equivalence factor in the equivalence factor table of Xie et al. [3],  
182 this national average value equivalence factor will be used. On this basis, by constructing the  
183 correction coefficient, it will be converted into the average value equivalence factor of ecosystem  
184 service function in Gansu Province, such as the fresh water supply, local climate regulation,  
185 entertainment aesthetic value, air quality regulation, water purification and other ecosystem  
186 service function.

187 2) For the ecosystem types and corresponding ecosystem service types in Gansu Province,  
188 The equivalence factor table of Xie et al. [3] includes this category, but in this study, through the  
189 international literature system Elsevier, Springer, nature, Willey and the Chinese How Net  
190 database, search for the published relevant literature. We inputted the retrieval words of Gansu  
191 Province, the names of each basin and city of Gansu Province, Qilian Mountain, Gannan Plateau,  
192 etc. to collect and sort out the research results of this kind of ecosystem service value calculated  
193 by ecosystem service function quantity in Gansu Province. If there are many papers on the  
194 evaluation of ESV, the journals with high influence in the near future shall be selected for average  
195 calculation, and the proportion with standard equivalent shall be calculated as the basic equivalent  
196 of such ecosystem service function, such as local climate regulation and soil conservation function  
197 of shrub, etc.

198 3) According to the newly added ecosystem types and corresponding ecosystem service

199 functions, we give priority to collect and sort out the domestic published research results of  
200 ecosystem service value calculated by ecosystem service function quantity in Gansu Province. The  
201 average of selected ESV should be calculated, then the proportion with standard equivalent also be  
202 calculated, so as to convert them into the average value equivalent factor of ecosystem service  
203 function in Gansu Province, as the basic equivalent of the ecosystem service function, which is  
204 used to determine the value equivalent of some ecosystem service functions, such as garden land,  
205 shrub land, forest land, swamp wetland, etc.

206 4) For the newly added ecosystem types and corresponding ecosystem service functions, if  
207 there are no relevant research results in Gansu Province, relevant research results in other regions  
208 in China shall be collected, ESV per unit area of ecosystem shall be calculated, then compared  
209 with standard equivalent value. It can be converted into average value equivalent factor of  
210 ecosystem service function in Gansu Province by constructing correction coefficient, as the basic  
211 equivalent of the ecosystem service function, which is used to determine the value equivalent of  
212 some ecosystem service functions, such as lakes, reservoirs, saline alkali land, urban green space,  
213 etc.

214 5) Considering the service functions of some ecosystems, there are great differences between  
215 Gansu Province and the whole country, although the equivalence factor table of Xie et al.[3]  
216 includes this types, but in this study, the value equivalence factor were localized and calibrated by  
217 calculating the ecosystem service function quantity per unit area, such as the biodiversity  
218 maintenance value of forest land, grassland, wetland and desert ecosystem, and the crop supply  
219 service of paddy field and dry land.

220 6) If there is no service function value of directly corresponding documents in the secondary

221 classification of ecosystem, and it is not easy to calculate the ESV according to the existing  
 222 documents, refer to the equivalent factors of Xie et al. [3] for the primary types are determined by  
 223 experts' experience, and at the same time, they are transformed into the average value equivalent  
 224 factors of the ecosystem service function in Gansu Province through the construction of the  
 225 correction coefficient, as the basic equivalent of the ecosystem service function, such as the local  
 226 climate regulation and air quality regulation of the secondary types of desert and wetland  
 227 ecosystem, and the soil conservation services and water purification services of second level of  
 228 desert ecosystem.

229 Through the above six process, we get the value of main ecosystem types for a certain  
 230 ecosystem service function per unit area in Gansu Province by referring to relevant literature or  
 231 calculation, as shown in Table 1 below.

232 **Table 1. Calculation basis of value equivalent factor per unit area in Gansu Province.**

| <b>Ecosystem service function</b> | <b>Calculation basis, literature source</b>                                                                                                                                                                                                                                                                                                                                                                                                                                                                                                                       | <b>The Value per unit area calculated in this study/actual estimated value of existing research used</b> |
|-----------------------------------|-------------------------------------------------------------------------------------------------------------------------------------------------------------------------------------------------------------------------------------------------------------------------------------------------------------------------------------------------------------------------------------------------------------------------------------------------------------------------------------------------------------------------------------------------------------------|----------------------------------------------------------------------------------------------------------|
| <b>Livestock supply</b>           | Maqu grassland[36], 1980s;<br>Shandan Racecourse[37], 2010<br>Etokqianqi grassland[38], 2014                                                                                                                                                                                                                                                                                                                                                                                                                                                                      | 498.44;<br>170.72;<br>1883.23;                                                                           |
| <b>Fresh water supply</b>         | The fresh water supply service of the lakes in Gansu Province (large and small Sugan lakes) is multiplied by the water price;<br>The average annual water supply volume, reservoir area and water price of large and medium-sized reservoirs and dams with statistical data in Gansu Province are used to calculate the unit area value of fresh water supply;<br>Wetlands in Jilin Province (permanent and seasonal rivers) [39], 2013;<br>Chinese Desert[40];<br>Desert equivalent is adopted for fresh water supply service of saline alkali land (no research | 4639.97;<br>14072.6;<br>12510;<br>265.69;<br>265.69;                                                     |

|                                    |                                                                                                                                                                                                                                                                                                                                                                                                                                                                                                                                                |                                                                                                                                 |
|------------------------------------|------------------------------------------------------------------------------------------------------------------------------------------------------------------------------------------------------------------------------------------------------------------------------------------------------------------------------------------------------------------------------------------------------------------------------------------------------------------------------------------------------------------------------------------------|---------------------------------------------------------------------------------------------------------------------------------|
|                                    | on fresh water supply of saline alkali land is retrieved).                                                                                                                                                                                                                                                                                                                                                                                                                                                                                     |                                                                                                                                 |
| <b>Local climate regulation</b>    | China Desert [40];<br>Gansu tea garden, carbon sequestration[41], 2011;<br>Carbon sequestration and oxygen release of urban green space in Qingdao [42], 2015;<br>Carbon sequestration, oxygen release and heat island mitigation of urban green space in Jinan [43], 2009;<br>Zhengzhou green space carbon sequestration, oxygen release and temperature reduction [44], 2003-2013;<br>Bush carbon sequestration and oxygen release in Gansu Province [45], 2015;<br>Carbon sequestration and oxygen release from deserts in China[46], 2004. | 1810.37;<br>268;<br>4439.4, 17630.61;<br>4908.69, 5785.94, 1268.78;<br>6496.37, 10313.77, 42108.85;<br>8076.98;<br>306, 281.88; |
| <b>Air quality regulation</b>      | Greenland, Zhengzhou [44], 2003-2013;<br>Jinan urban green space[43], 2009;<br>Qingdao urban green space[42], 2015;                                                                                                                                                                                                                                                                                                                                                                                                                            | 2064.53;<br>1406.39;<br>5216.62;                                                                                                |
| <b>Groundwater recharge</b>        | Farmland irrigation area in Bayin River Basin, Qinghai Province [47];<br>GuizhouHuahai wetland (Lake)[48], 2010;<br>KuTang, Jilin Province [49], 2014;<br>Jilin River[49] (Cui et al., 2017), 2014;<br>Jilin herbaceouswamp[49] , 2014;<br>Ice and snow melt water supply in Hexi Corridor [50], 2003;<br>Melting water supply of glaciers in the middle reaches of Heihe River [51], 1987-2000.                                                                                                                                               | 358.52;<br>7125.52;<br>7508.12;<br>9265.23;<br>3788.73;<br>22.77;<br>7.44;                                                      |
| <b>Soil conservation</b>           | China Desert[46], 2004;<br>Gansu thicket[45], 20092015;<br>Shenzhen urban green space [52], 2015;<br>Jinan urban green space [43], 2009;<br>Beijing Garden[53], 2004;<br>Gansu tea garden[41], 2011;                                                                                                                                                                                                                                                                                                                                           | 177;<br>1353.39;<br>1039.50;<br>1979.07;<br>7987.86;<br>33;                                                                     |
| <b>Windbreak and sand fixation</b> | Etuoqian grassland [38], 2014;<br>Desert of Maduo County [54], 2011, 2014;<br>Abihu Gobi[55], 2000-2015;                                                                                                                                                                                                                                                                                                                                                                                                                                       | 3817.69;<br>343.68;<br>248.91;                                                                                                  |

|                                       |                                                           |           |
|---------------------------------------|-----------------------------------------------------------|-----------|
|                                       | ABI Lake bare rock land [54], 2000-2015;                  | 38.19;    |
|                                       | ABI lake saline alkali land [55], 2000-2015;              | 388.58;   |
|                                       | Dry land of Ebinur Lake [55], 2000-2015;                  | 3313.41;  |
|                                       | JingdianIrrigation District forest[56], 2016;             | 9678.40;  |
| <b>Water purification</b>             | Forest land of Qilian Mountain Nature Reserve [57], 2008; | 2959.45;  |
|                                       | Shrubbery in Qilian Mountain Nature Reserve [57], 2008;   | 2642.03;  |
|                                       | Bailongjiang nature reserve forest [58], 2005;            | 3873.79;  |
|                                       | Coastal saline alkali land[59], 2000, 2011                | 2904.51;  |
|                                       | Baisha reservoir, Henan Province[60], 2018;               | 10596.60; |
|                                       | Lishimen reservoir, Zhejiang Province [61], 2018;         | 9281.33;  |
|                                       | Six key reservoirs in Zhejiang Province [62], 2011;       | 19963.12; |
| <b>Aesthetic entertainment value</b>  | Zhangye Heihe wetland [63], 2012;                         | 10102.95; |
|                                       | Beijing Garden[53], 2004;                                 | 16.14;    |
|                                       | Shenzhenurban green space[52], 2015;                      | 907.52;   |
|                                       | Bosten Lake[64], 2012;                                    | 8440;     |
| <b>Biodiversity maintenance value</b> | Gansu broad leaved forest, 2015;                          | 25033.95; |
|                                       | Coniferous forest, 2015;                                  | 7077.54;  |
|                                       | Mixed coniferous and broad leaved forest, 2015;           | 18895.23; |
|                                       | Gansu shrub, 2015;                                        | 2740.60;  |
|                                       | Gansu meadow, 2015;                                       | 18911.41; |
|                                       | Gansu Grassland, 2015;                                    | 9225.15;  |
|                                       | Other grasslands in Gansu, 2015;                          | 6309.70;  |
|                                       | Gansu Lake, 2015;                                         | 36.69;    |
|                                       | Gansu reservoir, 2015;                                    | 73.41;    |
|                                       | Gansu River, 2015;                                        | 267.28;   |
|                                       | Gansu herbaceous swamp, 2015;                             | 4233.29;  |
|                                       | Gansu desert, 2015;                                       | 166.02;   |
|                                       | Gansu bare rock, 2015;                                    | 285.89;   |
|                                       | Gansu saline alkali land, 2015;                           | 112.61;   |
|                                       | Gansu bare soil, 2015;                                    | 174.55;   |

## 233 Correction index of value equivalent factor per unit area

234 1) Crop supply correction index ( $N$ )

235 The calculation method of crop supply correction index is as follows:

$$236 \quad N=y/Y \quad (2)$$

237 Where,  $y$  is the average output per unit area in Gansu Province, and  $Y$  is the national average

238 output per unit area.

239 The calculation of  $y$  is based on the following formula:

240  $y = (\text{average yield per unit area of wheat}/\text{average yield per unit area of wheat}) \times \text{sowing}$   
241  $\text{proportion of wheat} + (\text{average yield per unit area of corn}/\text{average yield per unit area of corn}) \times$   
242  $\text{sowing proportion of corn} + (\text{average yield per unit area of potato}/\text{average yield per unit area of}$   
243  $\text{potato}) \times \text{sowing proportion of potato} + (\text{average yield per unit area of oil}/\text{average yield per unit}$   
244  $\text{area of oil}) \times \text{sowing of oil Proportion.}$

245 The calculation method of  $Y$  is the same as that of  $y$ .

246 2) Fresh water supply correction index ( $D$ )

247 The fresh water supply correction index is calculated as follows:

$$248 \quad D = w/W \quad (3)$$

249 Where,  $w$  is the average water supply per unit area in Gansu Province (10000m<sup>3</sup>), and  $W$  is  
250 the average water supply per unit area in China (10000m<sup>3</sup>). The data of water supply comes from  
251 water resources bulletin (2000-2015) in Gansu Province and China.

252 3) Air quality regulation correction index ( $K$ )

253 The air quality regulation correction index is calculated as follows:

$$254 \quad K = a/A \quad (4)$$

255 Where,  $a$  is the average proportion of air quality standards of prefecture level cities in Gansu  
256 Province,  $A$  is the average proportion of air quality standards of prefecture level cities in China,  
257 and the data of air quality standards comes from environmental quality bulletin (2000-2015) in  
258 Gansu Province and China.

259 4) Water purification correction index ( $S$ )

260 The calculation method of water purification correction index is as follows:

$$261 \quad S=q/Q \quad (5)$$

262 Where,  $q$  is the average length proportion of class I-III water reach in Gansu Province, and  $Q$   
263 is the average length proportion of class I-III water reach in China. The length data of water  
264 quality reach is from water resources bulletin (2000-2015) in Gansu Province and China.

265 5) Entertainment aesthetic value correction index (Y)

266 The calculation method of entertainment aesthetics value is calculated as follows:

$$267 \quad Y=r/R \quad (6)$$

268 Where,  $r$  is the average tourism revenue per unit area in Gansu Province,  $R$  is the average  
269 tourism revenue per unit area in China, and the data of tourism revenue comes from Statistical  
270 Yearbook (2000-2015) in Gansu Province and China.

## 271 **Regional difference adjustment index**

272 1) Crop supply regulation index ( $AI$ )

273 The calculation method of crop supply regulation index is as follows:

$$274 \quad AI_i=ai/A \quad (i \text{ is } 1, 2) \quad (7)$$

275 Where,  $ai$  is the average yield per unit area in Gansu Province,  $A$  is the average yield per unit  
276 area in Gansu Province, the calculation method of  $ai$  and  $A$  is the same as formula (1),  $a1$  is the  
277 high-yield area,  $a2$  is the low-yield area.

278 According to the research of Cheng [65], there are obvious spatial differences in the changes  
279 of grain production of cultivated land in Gansu Province. According to previous studies [66], the  
280 correlation between cultivated land quality and land use is relatively high, and the correlation  
281 coefficient reaches 0.874. Therefore, first of all, according to the cultivated land quality level (land



282 use level) of each county and referring to related research [67] on the spatial distribution of land  
283 use level in 2015 in Gansu Province. Secondly, according to the proportion of cultivated land use  
284 level in the total cultivated land area of each county in Gansu Province, 27% of the counties  
285 higher than the medium proportion in Gansu Province are divided into high-yield areas, and the  
286 rest are divided into low-yield areas; Then according to the grain yield and sowing area of each  
287 county in high and low yield areas in Gansu Province, the average yield per unit area is calculated  
288 in high and low yield areas respectively, At the same time, calculate the average yield per unit  
289 area of the whole Province (refer to the calculation result of Formula 1). Compare the average  
290 yield in high-yield area and low-yield area with the average yield per unit area in Gansu Province,  
291 and get the regulation index of crop supply in high-yield area and low-yield area.

292 2) Livestock supply adjustment index ( $A2$ )

293 The livestock supply adjustment index is calculated as follows:

294 
$$A2i=bi/b3 \quad (i \text{ is } 1, 2, 3) \quad (8)$$

295 Where,  $bi$  is the average livestock carrying capacity of each area. According to relevant  
296 literature,  $b1$  is the average livestock carrying capacity in agricultural area,  $b2$  is the average  
297 livestock carrying capacity in semi pastoral area, and  $b3$  is the average livestock carrying capacity  
298 in pastoral area.

299 Gansu Province is divided into pastoral area, semi pastoral area and agricultural area  
300 according to the list of semi pastoral areas and counties in China because of the great difference of  
301 livestock supply capacity between pastoral area and agricultural area. According to relevant  
302 research [68], the livestock carrying capacity is calculated in the agricultural and pastoral areas in  
303 Gansu Province. The livestock carrying capacity in the agricultural areas is 0.85 times of that in

304 the pastoral areas in Gansu Province. The average livestock carrying capacity in the agricultural  
305 and pastoral areas is taken as the livestock carrying capacity in the semi pastoral areas.

306 3) Fresh water supply regulation index ( $A3$ )

307 The calculation method of fresh water supply regulation index is as follows:

$$308 \quad A3i=ci/cl \quad (i \text{ is } 1, 2, 3) \quad (9)$$

309 Where,  $ci$  is the average water yield per unit area of each area,  $cl$  is the average water yield  
310 per unit area in the high water area,  $c2$  is the average water yield per unit area in the poor water  
311 area, and  $c3$  is the average water yield per unit area in the dry area.

312 The distance between East and West, North and south is large in Gansu Province, and the  
313 precipitation decreases from southeast to northwest due to the influence of water vapor and terrain.

314 According to the research [69], Gansu Province is divided into abundant water area  
315 (Liupanshan-Longshan area, Longnan mountain area, Gannan plateau, Qilian Mountain Area),  
316 poor water area (Longdong, Longdong Loess Plateau area, north of Lanzhou area) and dry area  
317 (Hexi Corridor, Beishan Mountain Area and its desert area bounded by Qilian mountain foot).

318 Using the water yield module in invest model, the average multi-year water yield of high water  
319 area, low water area and dry area is calculated in 2000-2015 in Gansu Province. Finally, the water  
320 yield per unit area in the low water area is 0.68 times of that in the high water area, and the water  
321 yield per unit area in the dry area is 0.08 times of that in the high water area.

322 4) Local climate regulation index ( $A4$ )

323 The calculation method of local climate regulation index is as follows:

$$324 \quad A4i=di/d2 \quad (i \text{ is } 1, 2, 3) \quad (10)$$

325 Where,  $di$  is the average NPP of each partition,  $d1$  is the NPP value of high adjustment area,

326  $d_2$  is the mean value of NPP in the middle regulation area, and  $d_3$  is the NPP value of low  
327 regulation area.

328 A large number of observation data analysis shows that, as the underlying surface of the  
329 climate system, the change of surface vegetation may have a significant impact on local and  
330 regional climate by changing surface attributes such as surface albedo, roughness, soil moisture  
331 [70-73]. The higher the area of vegetation net primary productivity (NPP), the stronger the  
332 function of climate adjustment. Therefore, the value of NPP is used to measure the regional  
333 difference of climate regulation. According to the spatial distribution characteristics of NPP and  
334 the boundary of township, Gansu Province is divided into high regulation area, middle regulation  
335 area and low regulation area. The average value of NPP in the three districts was calculated  
336 respectively, and the ratio of NPP was taken in the high regulation area and the middle adjustment  
337 area as the adjustment index in the high adjustment area. The ratio of the average value of NPP in  
338 the low adjustment area and the median adjustment area was used as the adjustment index of the  
339 low value area.

340 5) Air quality regulation index ( $A_5$ )

341 The air quality regulation index is calculated as follows:

$$342 \quad A_5 = e_i / e_2 \quad (i \text{ is } 1, 2, 3) \quad (11)$$

343 Where,  $e_i$  is the average vegetation coverage in each area,  $e_1$  is the average vegetation  
344 coverage in the area with good air quality,  $e_2$  is the average vegetation coverage in the area with  
345 general air quality, and  $e_3$  is the average vegetation coverage in the area with poor air quality.

346 Generally speaking, the better the air quality in a region, the greater the air quality regulation  
347 service function. According to 2015 environmental quality bulletin in Gansu Province,  $PM_{10}$  and

348 PM<sub>2.5</sub> are the main air pollutants; only one of the 14 cities and prefectures has reached the  
349 secondary standard of ambient air quality, so the concentration of the pollutant is taken as the  
350 index to measure the level of air quality regulation function. In this paper, PM<sub>10</sub> and PM<sub>2.5</sub>  
351 concentration monitoring data are selected in 111 provincial monitoring points in Gansu Province,  
352 and through Kriging interpolation, the spatial distribution of PM<sub>10</sub> and PM<sub>2.5</sub> concentration is  
353 obtained in the whole province, which is divided into three zones. The area meeting the secondary  
354 quality standard is classified as the area with the best air quality, indicating that the area has the  
355 highest air quality regulation function, and other areas are divided into two areas according to the  
356 concentration. According to the relevant research, vegetation coverage is closely related to the air  
357 purification function. In this paper, the ratio of the average vegetation coverage in three regions is  
358 used as the air quality regulation index.

359 6) Groundwater recharge regulation index ( $A_6$ )

360 The calculation method of groundwater recharge index is as follows:

361 
$$A_6i=f_i/f_l \quad (i \text{ is } 1, 2) \quad (12)$$

362 Where,  $f_i$  is the ratio of actual exploitation amount and exploitable amount of groundwater in  
363 each zone,  $f_l$  is the ratio of actual exploitation amount and exploitable amount of groundwater in  
364 over mining area,  $f_2$  is the ratio of actual exploitation amount and exploitable amount of  
365 groundwater in non over mining area, assuming that the actual exploitation amount and  
366 exploitable amount of groundwater in non over mining area are in balance, the ratio is set as 1.

367 The overexploitation of groundwater results in the drainage of aquifer, the decrease of  
368 groundwater level, the formation of funnel, and land subsidence. Therefore, when the rapid  
369 development exceeds the resource stock and environmental capacity, the value of groundwater

370 ecosystem will inevitably continue to appreciate. Different regions have different needs for  
371 groundwater recharge function, resulting in different values. In order to reflect the regional  
372 difference of groundwater recharge regulation function value, we uses groundwater over mining  
373 area and non over mining area to measure the regional difference of groundwater recharge  
374 function. Groundwater over mining area has higher groundwater recharge value than non over  
375 mining area. According to the delimitation results of groundwater over mining area in Gansu  
376 Province [74], there are 46 over mining areas, involving 32 counties. The ratio of the actual and  
377 exploitable groundwater in the over mining area is used as the groundwater supply regulation  
378 index in the over mining area.

379 7) Soil conservation regulation index ( $A7$ )

380 The calculation method of soil conservation regulation index is as follows:

$$381 \quad A7_i = g_i / g \quad (i \text{ is } 1, 2) \quad (13)$$

382 Where,  $g_i$  is the average erosion modulus of each area,  $g_1$  is the average erosion modulus of  
383 key prevention area,  $g_2$  is the average erosion modulus of key control area, and  $g$  is the allowable  
384 amount of soil erosion.

385 Gansu Province is located at the junction of three plateaus, and its soil conservation functions  
386 vary greatly in different areas. According to distribution range of soil and water loss in the key  
387 prevention areas and key control areas designated in Gansu Province, there have better vegetation,  
388 less soil and water loss, stronger soil conservation functions in the key prevention areas, but have  
389 low forest and grass coverage, fragile ecological environment, and serious soil and water loss in  
390 the key prevention area. Therefore, the whole Province is divided into two zones according to the  
391 range of the key prevention and control areas. At the same time, according to the classification

392 standards of soil erosion, the allowable amount of soil and water loss in the Northwest Loess  
393 Plateau is 1000t/km<sup>2</sup>. Based on the ratio of the average erosion modulus and the allowable amount  
394 of soil and water loss in the two zones, the adjustment index of soil conservation is constructed.

395 8) Regulation index of windbreak and sand fixation (*A8*)

396 The calculation method of windbreak and sand fixation regulation index is as follows:

397 
$$A8i=hi/h1 \quad (i \text{ is } 1, 2) \quad (14)$$

398 Where, *hi* is the amount of windbreak and sand fixation in each zone, *h1* is the amount of  
399 windbreak and sand fixation in the service area of windbreak and sand fixation, and *h2* is the  
400 amount of windbreak and sand fixation in other areas.

401 The Hexi Corridor in the north of Gansu Province and the surrounding county of Qingyang  
402 City is located in the desert Gebi area. Therefore, this area is classified as a service area for  
403 windbreak and sand fixation, while other areas are not considered to have the function of  
404 windbreak and sand fixation.

405 9) Water purification regulation index (*A9*)

406 The calculation method of water purification regulation index is as follows:

407 
$$A9i=ji/j2 \quad (i \text{ is } 1, 2) \quad (15)$$

408 Where, *ji* is the target proportion of water quality in each zone; *j1* is the length proportion of  
409 class II and above water reaches in high water purification area; *j2* is the length proportion of class  
410 III and below water reaches in low water purification area.

411 Xie et al. [75] pointed out that as the pollution of rivers and lakes is becoming more and more  
412 serious, the water quality regulation function of rivers is becoming lower and lower, and rivers  
413 and lakes almost become the place for waste. Generally speaking, the water quality of the reach is

414 closely related to its water purification function. If the water quality of this area is significantly  
415 better than that of other areas, the water purification function of this area is of great importance. In  
416 this study, the water quality objectives of 236 monitoring sections of the river in Gansu Province  
417 are used to measure the water purification function of the region where the river is located, and the  
418 water quality objectives of each county are counted. If the water quality objectives of class I, class  
419 II or class II water and class III water reaches can be achieved simultaneously, the water  
420 purification function of the county is considered to be high, and that of other water quality  
421 counties is considered to be water purification function low. At the same time, the length  
422 proportion of class II water reach and class III water reach and below are calculated. The length  
423 proportion of class II water reach to class III water reach and below is taken as the water  
424 purification regulation index in high water purification area.

425 10) Entertainment aesthetics value adjustment index ( $A10$ )

426 The value adjustment index of entertainment aesthetics is calculated as follows:

427 
$$A10_i = k_i \quad (i \text{ is } 1, 2, 3) \quad (16)$$

428 Where,  $k_i$  is the value adjustment index of entertainment aesthetics in each zone,  $k_1$  is the  
429 value adjustment index of entertainment aesthetics in key tourist areas,  $k_2$  is the value adjustment  
430 index of entertainment aesthetics in general tourist areas, and  $k_3$  is the value adjustment index of  
431 entertainment aesthetics in other regions.

432 Entertainment value refers to the value obtained by tourists when they are engaged in tourism  
433 activities in the ecotourism scenic spot, which is the sum of the use value brought by direct  
434 recreation and the non use value possessed by resources; aesthetic value refers to the pleasure  
435 value brought by natural ecosystem to people's aesthetic perception by its natural landscape and

436 cultural landscape directly bred, and the value of its own objective aesthetic attribute belongs to  
437 non use value. If people cannot reach the area that can bring recreational and pleasure value to  
438 people, it is considered that the area cannot provide the service function or temporarily does not  
439 have the function. Based on this, we first determine that the core area and buffer area of the Nature  
440 Reserve cannot provide this service temporarily. Other nature protected place such as Forest Park,  
441 Geopark, Scenic Area, Wetland Park, etc. are the key tourism areas, which provide the highest  
442 entertainment aesthetic value. Secondly, the whole tourism county (excluding the key tourism  
443 areas) is regarded as the general tourism area, and other areas enjoy the entertainment aesthetics  
444 value is the lowest. The adjustment indexes of different regions are assigned by expert judgment.

445 11) Biodiversity maintenance value regulation index ( $a_{11}$ )

446 The value adjustment index of biodiversity maintenance is calculated as follows:

447 
$$A_{11i} = l_i / l_1 \quad (i \text{ is } 1, 2) \quad (17)$$

448 Where,  $l_i$  is the habitat quality index of each region,  $l_1$  is the habitat quality index of priority  
449 area for biodiversity conservation;  $l_2$  is the habitat quality index of other regions.

450 According to the conservation plan of biodiversity priority area in Gansu Province, there are  
451 seven biodiversity priority areas in Gansu Province. This paper considers that the areas located in  
452 the priority areas have the highest biodiversity maintenance value, followed by other areas, so the  
453 province is divided into two areas. In order to determine the adjustment index of different regions,  
454 this paper uses the habitat quality module of invest model to calculate the habitat quality index of  
455 different regions, and determines the adjustment index by comparing the size of the habitat quality  
456 index in the two regions.

457 Through the above methods, the value equivalent factors table per unit area is established in



458 Gansu Province (Table 2).

459 **Table 2. The value equivalent factors per unit area in Gansu Province**

| Primary types   | Secondary types | Supply services |      |       |      | Regulatory services |      |      |      |      | Cultural Services |       | - |
|-----------------|-----------------|-----------------|------|-------|------|---------------------|------|------|------|------|-------------------|-------|---|
|                 |                 | A               | B    | C     | D    | E                   | F    | G    | H    | I    | J                 | K     |   |
| Cultivated land | 1               | 1.07            | 0.00 | -2.63 | 0.57 | 0.14                | 0.14 | 0.01 | 0.00 | 0.18 | 0.07              | 0.09  |   |
|                 | 2               | 0.67            | 0.00 | 0.01  | 0.36 | 0.08                | 0.00 | 1.03 | 1.34 | 0.11 | 0.04              | 0.06  |   |
|                 | 3               | 5.82            | 0.00 | 0.12  | 0.11 | 1.54                | 0.00 | 1.62 | 1.06 | 2.05 | 0.01              | 0.48  |   |
|                 | 4               | 0.22            | 0.00 | 0.13  | 5.07 | 1.19                | 0.00 | 2.06 | 0.00 | 1.58 | 0.28              | 2.85  |   |
| Forest          | 5               | 0.31            | 0.00 | 0.17  | 7.03 | 1.59                | 0.00 | 2.86 | 0.00 | 2.11 | 0.39              | 7.61  |   |
|                 | 6               | 0.29            | 0.00 | 0.16  | 6.50 | 1.54                | 0.00 | 2.65 | 3.84 | 2.05 | 0.36              | 10.09 |   |
|                 | 7               | 0.19            | 0.00 | 0.10  | 3.25 | 1.44                | 0.00 | 0.55 | 0.97 | 1.36 | 0.23              | 1.10  |   |
| Grassland       | 8               | 0.22            | 0.20 | 0.08  | 3.02 | 0.80                | 0.00 | 1.39 | 0.60 | 1.06 | 0.43              | 7.62  |   |
|                 | 9               | 0.10            | 0.07 | 0.04  | 1.34 | 0.35                | 0.00 | 2.00 | 1.54 | 0.47 | 0.19              | 3.72  |   |
|                 | 10              | 0.38            | 0.07 | 0.15  | 5.21 | 1.38                | 0.00 | 2.40 | 0.60 | 1.82 | 0.33              | 2.54  |   |
|                 | 11              | 0.00            | 0.00 | 1.87  | 2.29 | 2.88                | 2.87 | 0.93 | 0.00 | 4.25 | 0.64              | 0.01  |   |
| Wetland         | 12              | 0.00            | 0.00 | 5.67  | 2.29 | 2.88                | 3.03 | 0.93 | 0.00 | 5.67 | 0.64              | 0.03  |   |
|                 | 13              | 0.00            | 0.00 | 5.04  | 2.29 | 2.88                | 3.73 | 0.93 | 0.00 | 5.88 | 0.64              | 0.11  |   |
|                 | 14              | 0.51            | 0.00 | 2.59  | 3.60 | 2.88                | 1.53 | 2.31 | 0.14 | 3.82 | 4.11              | 1.71  |   |
| Cities          | 15              | 0.00            | 0.00 | 0.00  | 0.00 | 0.10                | 0.00 | 0.00 | 0.10 | 0.11 | 0.01              | 0.00  |   |
|                 | 16              | 0.00            | 0.00 | -0.23 | 5.54 | 0.70                | 0.00 | 0.61 | 1.06 | 1.35 | 0.37              | 0.79  |   |
|                 | 17              | 0.00            | 0.00 | 0.11  | 0.73 | 0.08                | 0.00 | 0.07 | 0.10 | 0.11 | 0.02              | 0.06  |   |
| Desert          | 18              | 0.00            | 0.00 | 0.00  | 0.24 | 0.08                | 0.00 | 0.07 | 0.02 | 0.11 | 0.00              | 0.12  |   |
|                 | 19              | 0.00            | 0.00 | 0.11  | 0.24 | 0.08                | 0.00 | 0.07 | 0.16 | 1.24 | 0.00              | 0.05  |   |
|                 | 20              | 0.00            | 0.00 | 0.00  | 0.24 | 0.08                | 0.00 | 0.07 | 0.10 | 0.11 | 0.00              | 0.07  |   |
| Glacier         | 21              | 0.00            | 0.00 | 1.02  | 0.54 | 0.13                | 0.01 | 0.00 | 0.00 | 0.17 | 0.03              | 0.01  |   |

460 1 Paddy field; 2 Non irrigated farmland; 3 Garden land; 4 Deciduous broad-leaved forest; 5 Evergreen coniferous forest; 6 Coniferous

461 broad-leaved mixed forest; 7 Deciduous broad-leaved shrub; 8 Meadow; 9 Grassland; 10 Other grassland; 11 Lake; 12 Reservoir; 13

462 River; 14 Herbaceous wetland; 15 Construction land; 16 Urban green land; 17 Desert; 18 Bare rock; 19 Saline alkali land; 20 bare land; 21

463 Glacier

464 A: Crops supply; B: livestock supply; C: Fresh water supply; D: Local climate regulation; E: Air quality regulation; F: Groundwater

465 supply; G: Soil conservation; H: Windbreak and sand fixation; I: Water purification; J: Entertainment aesthetic value; K: Biodiversity

466 maintenance value.

## 467 Value evaluation model based on regional difference

468 Different geomorphic types will affect the distribution of light, heat, water and soil types in  
469 the region [76]. Different regional ecological environment, degree of ecological protection,  
470 intensity of ecological demand for different land use types and implementation of local policies  
471 will affect the benefits human beings get from the ecosystem, thus affecting the regional  
472 differences and divisions of ESV. The ArcGIS spatial analysis tool is used to grid Gansu Province,  
473 and a complete grid of 1km×1km is extracted. Based on the calculation of ESV of grid unit, the  
474 total ESV is calculated in Gansu Province by the following formula (Fig 2). The total ESV in  
475 Gansu Province ( $V$ ) can be expressed as:

$$476 \quad V = \sum_{i=1}^c V_c \quad (18)$$

477 Where,  $V_c$  is the value of ecosystem service function  $c$ ,  $c$  is ecosystem service function, and  
478 the value is 1, 2.... 11.

$$479 \quad V_c = \sum_{i=1}^n \sum_{j=1}^m D \cdot F_m \cdot A_c \cdot S_m \quad (19)$$

480 Where,  $D$  is the standard equivalent factor,  $F_m$  is the value equivalent factor per unit area of  
481 ecosystem type  $m$ ,  $A_c$  is the regional difference adjustment index of ecosystem service function  $c$ ,  
482  $S_m$  is the area of ecosystem type  $m$  (ha),  $n$  is the grid number.

483 **Fig 2. The flow chart of ecosystem service value evaluation model based on regional**  
484 **differences**

## 485 **Results**

### 486 **Analysis on the change of ecosystem in Gansu Province**

487 From the composition of ecosystem types in Gansu Province (Table 3), desert is the largest  
488 type in Gansu Province, followed by grassland, arable land, forest ecosystem. Both glacier and  
489 wetland ecosystem only account for a small part. Desert are mainly distributed in the north of  
490 Gansu; grasslands are mainly distributed in the Gannan plateau, central and Eastern of Gansu;

491 cultivated land is mainly distributed in the middle of Gansu, Hexi Corridor; and forests are mainly  
492 distributed in Longnan, Ziwuling and Qilian Mountains. According to the change of ecosystem  
493 area in Gansu Province, the forest, grassland and urban ecosystem have been increasing  
494 continuously in the past 15 years in Gansu Province. The cultivated land ecosystem has been  
495 decreasing continuously. Although the wetland and glacier ecosystem have been increasing in the  
496 past 15 years, they have been decreasing in general. The desert ecosystem has been increasing in  
497 general.

498 **Table3. Change of ecosystem pattern from 2000 to 2015 in Gansu Province (km<sup>2</sup>)**

| Types of ecosystem | 2000      | 2005      | 2010      | 2015      |
|--------------------|-----------|-----------|-----------|-----------|
| Forest             | 54372.71  | 55118.01  | 56178.19  | 56228.06  |
| Grassland          | 120419.34 | 122061.74 | 124629.60 | 124739.27 |
| Wetland            | 2624.82   | 2732.48   | 2440.76   | 2545.59   |
| Cultivated land    | 76454.39  | 74362.82  | 68743.14  | 68328.45  |
| Cities             | 3438.61   | 3723.99   | 4071.09   | 4624.28   |
| Desert             | 167223.90 | 166546.96 | 168485.42 | 168076.37 |
| Glacier            | 909.06    | 896.83    | 894.63    | 900.81    |

### 499 **Overall evaluation of ESV in Gansu Province**

500 In general, ESV decreases from south to North and from east to west in Gansu Province (Fig  
501 3), which is consistent with the spatial distribution of forest, grassland and desert ecosystem.  
502 There are contiguous desert areas in the north of Gansu Province with the lowest ESV. However,  
503 the ecological environment is relatively good in the south of Gansu Province, with high vegetation  
504 coverage and ESV. In the Middle East of Gansu Province where human activities are frequent,  
505 which induced relatively high disturbance on the natural ecological environment, thus ESV is  
506 relatively low.

### 507 **Fig 3. The ESV from 2000 to 2015 in Gansu Province**

508 From the value of each service function of ecosystem (Table 4), the value of local climate

509 regulation and biodiversity maintenance is much higher than that of other service functions, which  
510 constitutes the main component of ESV in Gansu Province. From the change of each service  
511 function value, the value of soil conservation, windbreak and sand fixation, biodiversity protection  
512 has been increasing continuously in the past 15 years, while the supply value of crops is  
513 decreasing continuously. The supply value of fresh water, local climate regulation, air quality  
514 regulation, water purification function, groundwater supply and entertainment aesthetic value  
515 show a fluctuating change state and a decreasing trend as a whole.

516 **Table 4. The ESV from 2000 to 2015 in Gansu Province (10<sup>8</sup>Yuan)**

| ES                                      | 2000     | 2005     | 2010     | 2015     |
|-----------------------------------------|----------|----------|----------|----------|
| <b>Crops supply</b>                     | 965.67   | 958.54   | 886.63   | 879.29   |
| <b>Livestock supply</b>                 | 92.81    | 93.78    | 93.03    | 93.09    |
| <b>Fresh water supply</b>               | 199.34   | 201.60   | 197.55   | 198.90   |
| <b>Local climate regulation</b>         | 8216.79  | 8301.09  | 8164.14  | 8171.22  |
| <b>Air quality regulation</b>           | 1961.98  | 1978.94  | 1925.38  | 1928.47  |
| <b>Groundwater recharge</b>             | 70.64    | 76.43    | 57.67    | 63.62    |
| <b>Soil conservation</b>                | 1551.19  | 1559.10  | 1605.89  | 1606.29  |
| <b>Windbreak and sand fixation</b>      | 728.68   | 734.78   | 772.64   | 774.98   |
| <b>Water purification</b>               | 2932.81  | 2958.28  | 2819.21  | 2824.91  |
| <b>Aesthetic value of entertainment</b> | 425.42   | 427.25   | 418.56   | 418.76   |
| <b>Biodiversity maintenance value</b>   | 5215.96  | 5278.48  | 5428.37  | 5436.01  |
| <b>Total value</b>                      | 22361.29 | 22568.27 | 22369.07 | 22395.55 |

517 From the value composition of each ecosystem type (Table 5), the value of grassland and  
518 forest ecosystem is the highest, accounting for more than 75% of the total value, while the value  
519 of urban and glacial ecosystem is lowest. From the change of each ecosystem type value, the value  
520 of forest and urban ecosystem is increasing, while the value of cultivated land ecosystem is  
521 decreasing; The value of grassland, wetland and glacier ecosystem is fluctuating, and the overall  
522 trend is decreasing. In contrast, the value of desert ecosystem is fluctuating, and the overall trend  
523 is increasing. Over the past 15 years, the total value of various ecosystem services has increased  
524 by 3.426 billion Yuan, and the increase of forest ecosystem value is the most, while the decrease

525 of grassland ecosystem value is the most.

526 **Table 5. Value of each ecosystem type from 2000 to 2015 in Gansu Province (10<sup>8</sup>Yuan) and**  
 527 **proportion (%)**

| Ecosystem              | 2000     |            | 2005     |            | 2010     |            | 2015     |            |
|------------------------|----------|------------|----------|------------|----------|------------|----------|------------|
|                        | Value    | Proportion | Value    | Proportion | Value    | Proportion | Value    | Proportion |
| <b>Forest</b>          | 7193.20  | 32.17      | 7312.00  | 32.40      | 7477.01  | 33.43      | 7489.26  | 33.44      |
| <b>Grassland</b>       | 10222.26 | 45.71      | 10352.27 | 45.87      | 10181.71 | 45.52      | 10188.37 | 45.49      |
| <b>Wetland</b>         | 371.43   | 1.66       | 383.54   | 1.70       | 348.94   | 1.56       | 359.66   | 1.61       |
| <b>Cultivated land</b> | 2969.03  | 13.28      | 2918.64  | 12.93      | 2671.66  | 11.94      | 2659.78  | 11.88      |
| <b>Cities</b>          | 109.32   | 0.49       | 118.56   | 0.53       | 131.50   | 0.59       | 140.64   | 0.63       |
| <b>Desert</b>          | 1484.10  | 6.64       | 1471.39  | 6.52       | 1547.69  | 6.92       | 1547.25  | 6.91       |
| <b>Glacial</b>         | 11.95    | 0.05       | 11.86    | 0.05       | 10.55    | 0.05       | 10.59    | 0.05       |
| <b>Total</b>           | 22361.29 | 100.00     | 22568.27 | 100.00     | 22369.07 | 100.00     | 22395.55 | 100.00     |

528 **Analysis on the spatio-temporal change of ESV in Gansu**  
 529 **Province**

530 From the spatial changes of ESV(Fig 4), over the past 15 years, the township with increased  
 531 ESV are mainly distributed in the east of Gansu Province, the south of Gansu Province and the  
 532 west of Hexi Corridor; the township with decreased ESV are distributed in Qilian Mountain and  
 533 Gannan plateau.

534 **Fig 4. The change distribution map of ESV for each town from 2000-2015 in Gansu Province**

535 From the change of ecosystem service value every five years, over the past 15 years, the  
 536 number of township with increased ESV has become less and less. There were 959 township  
 537 increased in 2000-2005, 758 township in 2005-2010, and only 391 township increased in value in  
 538 2010-2015. From 2000 to 2015, there were 818 townships with increased ESV.

539 From 2000 to 2005, the township with increased ESV are mainly distributed in Qilian  
 540 Mountains, Eastern and southern of Gansu (Tianshui, Pingliang, Qingyang and Longnan). From

541 2005 to 2010, ESV of most townships has decreased in Gannan plateau and Qilian Mountain,  
542 while the increased township were mainly located in Tianshui, Longnan and the western section of  
543 Hexi corridor. From 2010 to 2015, ESV of most township was declining in Lanzhou, Baiyin,  
544 Dingxi, Gannan plateau and Hexi corridor, and the value-added township were compressed to the  
545 north and south.

## 546 **Discussion**

### 547 **Advanced Value Evaluation Model**

548 In this study, ESV was evaluated by improving value equivalent factor per unit area and  
549 constructing a regional differential value assessment model in Gansu Province. Different  
550 ecosystem types provide different ES types to humans. In the current research on ESV, scholars  
551 mostly refer to the classification of ecosystem types by Costanza et al. [5], which is simply  
552 divided into forest, grassland, farmland, wetland, desert and river. Although Xie et al. [3]  
553 improved this method by accounting of the value of 14 types of ecosystem services in China, and  
554 more precisely reflected the differences between ecosystem types. However, this method is based  
555 on the national scale, which cannot meet the needs of practical research i.e. reduction of the  
556 research scale and refinement of the classification of ecosystems. According to the actual  
557 ecological situation in Gansu Province, this study identify 7 types of primary ecosystems and 21  
558 types of secondary ecosystems to cover the main ecosystems types in Gansu Province more  
559 comprehensively, which reflect the differences between the types of ecosystems, and then  
560 accurately reflect the importance of ESV.

561 In different regions, even if the same ecosystem type provides different ES and their value to  
562 humans are quite different. Therefore, the value equivalent factor of Costanza et al.[5] and Xie et

563 al. [3] is improved by scholars in practical research, and factors are introduced that could reflect  
564 regional differences, such as NPP, biomass, vegetation coverage, and soil erosion. However, these  
565 factors can only reflect the regional differences in the main types of ES functions that are mainly  
566 driven by natural factors. It is even more difficult to truly reflect differences of ecological service  
567 functions in the region with complex ecological environment characteristics and socioeconomic  
568 conditions in Gansu Province. In this study, firstly, correction index of value equivalent factor per  
569 unit area s constructed. We directly convert the equivalent factor on the national average level of  
570 Xie et al. [3] to the average level in Gansu Province; and directly calculate the average level of  
571 some equivalent factors in Gansu Province, and then convert the equivalent factors in the average  
572 level in Gansu Province to the level with significant regional differences by constructing the  
573 regional difference adjustment index of each ES function type. In the process of regional  
574 difference conversion, the differences have been fully considered in the ecological environment  
575 quality, resource endowment, and economic and social development of different regions. These  
576 can better reflect the ecological well-being of residents in different regions or the degree of  
577 damage to the local ecological environment and resources.

## 578 **Errors in the value evaluation model**

579 In the value evaluation method based on the equivalent factor, the accurate construction of  
580 the equivalent factor table is the core of the equivalent factor method. In the process of improving  
581 the equivalent factor table of Xie et al. [3], this study integrated evaluation results from literatures  
582 based on the physical quantity method in Gansu Province or other regions in China. This can  
583 avoid or reduce the subjective conjecture which is easily caused by the empiricism from the past.  
584 The accuracy of the research results in the literature on different ES types will affect the size of

585 the equivalent factor in this study. Considering the incomplete research results of different  
586 ecosystems or ecological service functions in Gansu Province, the ecological service functions of  
587 some ecosystem types are investigated based on the relevant research results from the available  
588 regions in China, which will inevitably lead to a certain amount of uncertainty in this study. Future  
589 research need to quantitatively calculate the physical quantity for the ecosystem type or ecological  
590 service function that are not available in current research results, and then to determine the  
591 equivalent factor to improve the relevant results of this research.

## 592 **Reliability of value evaluation models**

593       ESV assessment research has always been a hot topic in other regions in China, while there  
594 are few related researches on ESV in Gansu Province. The existing research only focus on the  
595 value of a single ecosystem service on the provincial scale [27,32,77], and the calculation method  
596 of unit area value is the main method, however, the research on the provincial integrated ESV is  
597 almost blank at present[78]. The value of forest ecosystem services is 747.70 billion Yuan in this  
598 study. This study does not consider the difference of people's willingness to pay and ability to pay  
599 for ESV caused by the social development. By including the willingness to pay and ability to pay,  
600 the value of forest ecosystem services is 1971.228 billion Yuan in 2010, which is the same with  
601 the official release of service value of forest ecosystem (2007.97 billion Yuan in 2011), and the  
602 service value of forest ecosystem assessed by Wang et al. [27] (2163.86 billion Yuan). However,  
603 there is a big difference between the ESV evaluated in Gansu Province by Qi [78] and the ESV in  
604 this study. The value per unit area is only 98.569 billion Yuan in 2010 [78] by using the value  
605 calculation method per unit area. Obviously, the assessment result is significantly smaller.

## 606 **Conclusions**



607 Based on the characteristics of ecosystem in Gansu Province, this paper built up a revised  
608 index based on the increase of some ecosystem equivalent factors, and revised the equivalent  
609 factors studied by Xie et al. [3] to form an equivalent factor table in line with ecosystem service  
610 valuation in Gansu Province, then constructed 11 regional differences adjustment index to readjust  
611 the value of different service functions. The regional difference assessment model constructed in  
612 this paper distinguished the regional differences in the similar ecosystems services to evaluate the  
613 ESV in Gansu Province more objectively. The main conclusions are as follows:

614 (1) The desert ecosystem is the type with the largest area in Gansu Province, followed by  
615 grassland, arable land, and forest ecosystems, and the remaining ecosystems that account for only  
616 a small part. Desert mostly locates in northern Gansu. Grasslands are mainly distributed in the  
617 Gannan Plateau, Longzhong, and Longdong. Cultivated land is mainly distributed in Longzhong  
618 and Hexi corridors, and forests are mainly distributed in Longnan, Ziwuling, and Qilian  
619 Mountains.

620 (2) From 2000 to 2015, the grassland ecosystem area increased the most, while the cultivated  
621 land ecosystem area decreased the most. Forest, grassland, and urban ecosystems in Gansu  
622 Province continue increasing. Cultivated land ecosystems continue decreasing. Although wetlands  
623 and glacial ecosystems have increased during the past 15 years, they have generally decreased.  
624 Desert ecosystems have increased.

625 (3) In 2015, the total ESV reached 2239.555 billion Yuan in Gansu Province, among which  
626 forest and grassland ecosystems contribute the most. In terms of the value of each service function  
627 of the ecosystem, the local climate regulation and biodiversity maintenance functions are the main  
628 service functions in Gansu Province. On the spatial distribution of service values, ESV gradually

629 increases from northeast to southwest, and the areas with high ESV concentration are Qilian  
630 Mountain and Longnan Mountain.

631 (4) From 2000 to 2015, ESV increased by 3.426 billion Yuan in Gansu Province. The value  
632 of forest ecosystems increases the most, while the value of grassland ecosystems decreases the  
633 most, showing a trend of increasing first, then decreasing, then slowly increasing. The value of  
634 forest and urban ecosystems continues to increase, and the value of cultivated land ecosystems  
635 continues to decrease. From the spatial characteristics of ESV changes, areas with reduced value  
636 gradually move from central Gansu to surrounding areas.

## 637 **Acknowledgments**

638 We are also grateful for the comments and criticisms of an early version of this manuscript  
639 by our colleagues and the journal's reviewers. Acknowledgement for the data support from  
640 "National Earth System Science Data Center, National Science & Technology Infrastructure of  
641 China. (<http://www.geodata.cn>)"

## 642 **References**

- 643 1. Lu CX, Xie GD, Xiao Y, Yu YJ. Ecosystem diversity and economic valuation of Qinghai-Tibet  
644 Plateau. *Acta Ecologica Sinica*; 2004; 24(12): 2740-2756. [https://doi.org/10.1088/  
645 1009-0630/6/5/011](https://doi.org/10.1088/1009-0630/6/5/011).
- 646 2. Daily GC. The value of nature and the nature of value. *Science*; 2000; 289:  
647 395-396. [https://doi.org/10.1126/  
648 science.289.5478.395](https://doi.org/10.1126/science.289.5478.395).
- 649 3. Xie GD, Zhang CX, Zhang LM, Chen WH, Li SM. Improvement of the Evaluation Method for  
650 Ecosystem Service Value Based on Per Unit Area. *Journal of Natural Resources*; 2015; 30(8):  
1243 -1254. <https://doi.org/10.11849/zrzyxb.2015.08.001>.

- 651 4. Leemans HBJ, Groot RSD. Millennium ecosystem assessment: Ecosystems and human  
652 well-being: a frame work for assessment. *PhysicsTeacher*; 2003; 34(9): 534-534. <https://doi.org/10.1119/1.2344558>.
- 653
- 654 5. Costanza R, d'Arge R, de Groot R, Farber S, Grasso M, Hannon B, et al. The value of the  
655 world's ecosystem services and natural capital. *Nature*; 1997; 387: 253-260. [https://doi.org/10.1016/S0921-8009\(98\)00020-2](https://doi.org/10.1016/S0921-8009(98)00020-2).
- 656
- 657 6. Daily GC, Natures service: social dependence on natural ecosystems. Washington D C; 1997.
- 658 7. Sun J. Research advances and trends in ecosystem services and evaluation in China. *Procedia*  
659 *Environmental Sciences*; 2011; 10: 1791-1796. <https://doi.org/10.1016/j.proenv.2011.09.280>.
- 660 8. Zhang B, Li WH, Xie GD. Ecosystem services research in China: Progress and perspective.  
661 *Ecological Economics*; 2010; 69(7): 1389-1395. [https://doi.org/10.1016/j.ecolecon.2010.03.](https://doi.org/10.1016/j.ecolecon.2010.03.009)  
662 009.
- 663 9. Shi Y, Wang RS, Huang JL, Yang WR. An analysis of the spatial and temporal changes in  
664 Chinese terrestrial ecosystem service functions. *Chinese Science Bulletin*; 2012; 57(17):  
665 2120-2131. <https://doi.org/CNKI:SUN:KXTB.0.2012-09-007>.
- 666 10. Yu ZY, Bi H. The key problems and future direction of ecosystem services research. *Energy*  
667 *Procedia*; 2011; 5: 64-68. <https://doi.org/10.1016/j.egypro.2011.03.012>.
- 668 11. Ouyang ZY, Zheng H, Xiao Y, Polasky S. Improvements in ecosystem services from  
669 investments in natural capita. *Science*; 2016; 352(6292): 1455-1459. [https://doi.org/10.1126/](https://doi.org/10.1126/science.aaf2295)  
670 *science.aaf2295*.
- 671 12. Cao W, Li R, Chi X, Chen N, Chen J, Zhang H. Island urbanization and its ecological  
672 consequences: a case study in the Zhoushan Island, East China. *Ecological Indicators*; 2017;

- 673 76:1-14. <https://doi.org/10.1016/j.ecolind.2017.01.001>.
- 674 13. Li BJ, Chen DX, Wu SH, Zhou SL. Spatio-temporal assessment of urbanization impacts on  
675 ecosystem services: case study of Nanjing City, China. *Ecological Indicators*; 2016; 71: 416  
676 -427. <https://doi.org/10.1016/j.ecolind.2016.07.017>.
- 677 14. Li L, Wang XY, Luo L, Ji XY, Zhzo Y, Zhao YC, et al. A systematic review on the methods  
678 of ecosystem services value assessment. *Chinese Journal of Ecology*; 2018; 37(4): 1233-1245.  
679 <https://doi.org/10.13292/j.1000-4890.201804.031>.
- 680 15. Boithias L, Terrado M, Corominas L, Ziv G, Kumar V, Marqués M, et al. Analysis of the  
681 uncertainty in the monetary valuation of ecosystem services-a case study at the river basin  
682 scale. *Science of the Total Environment*; 2016; 543(Pt A): 683-690. [https://doi.org/10.1016/  
683 j.scitotenv.2015.11.066](https://doi.org/10.1016/j.scitotenv.2015.11.066).
- 684 16. Richardson L, Loomis J, Kroeger T, Casey, F. The role of benefit transfer in ecosystem service  
685 valuation. *Ecological Economics*; 2015; 115: 51-58. [https://doi.org/10.1016/j.ecolecon.2014.  
686 02.018](https://doi.org/10.1016/j.ecolecon.2014.02.018).
- 687 17. Costanza R, Groot RD, Sutton P, Ploeg SVD, Anderson SJ, Kubiszewski I, et al. Changes in  
688 the global value of ecosystem services. *Global Environmental Change*; 2014; 26: 152 - 158.  
689 <https://doi.org/10.1016/j.gloenvcha.2014.04.002>
- 690 18. Xie GD, Lu CX, Zheng D, Li SC. Ecological assets valuation of the Tibetan Plateau. *Journal*  
691 *of Natural Resources*; 2003; 18(2): 189-196. [https://doi.org/10.3321/j.issn:1000-3037.  
692 2003.02.010](https://doi.org/10.3321/j.issn:1000-3037.2003.02.010).
- 693 19. Xie GD, Zhen L, Lu CX, Xiao Y, Chen C. Expert knowledge based valuation method of  
694 ecosystem services in China. *Journal of Nature Resources*; 2008; 23(5): 911-919. <https://doi.org/10.1016/j.jnr.2008.05.002>.

- 695 [//doi.org/10.11849/zrzyxb.2008.05.019](https://doi.org/10.11849/zrzyxb.2008.05.019).
- 696 20. Boyle KJ, Bergstrom JC. Benefit transfer studies: myths, pragmatism, and idealism. *Water*  
697 *Resources Research*; 1992; 28(3): 657-663. <https://doi.org/10.1029/91wr02591>.
- 698 21. Loomis JB, Rosenberger RS. Reducing barriers in future benefit transfers: needed  
699 improvements in primary study design and reporting. *Ecological Economics*; 2006; 60(2):  
700 343-350. <https://doi.org/10.1016/j.ecolecon.2006.05.006>.
- 701 22. Sharp R, Tallis HT, Rickett T. InVEST+VERSION+User's guide. The natural capital project,  
702 Stanford university, university of Minnesota, the nature conservancy, and World Wildlife Fund  
703 [EB/OL]. (2013-03-05)[2018-04-05]. [http:](http://data.natura/capita/project.org/night/y-build/release_dufault/release_default/documentation/)  
704 [//data.natura/capita/project.org/night/y-build/release\\_dufault/release\\_default/documentation/](http://data.natura/capita/project.org/night/y-build/release_dufault/release_default/documentation/);  
705 2013.
- 706 23. SunX, Crittenden JC, Lif, Lu ZG, Dou XL. Urban expansion simulation and the  
707 spatio-temporal changes of ecosystem services, a case study, in Atlanta Metropolitan area,  
708 USA. *Science of the Total Environment*; 2018; 622: 974-987. [https://doi.org/10.1016/j.](https://doi.org/10.1016/j.scitotenv.2017.12.062)  
709 [scitotenv.2017.12.062](https://doi.org/10.1016/j.scitotenv.2017.12.062).
- 710 24. Paracchini M L, Zulian G, Kopperoinen L, Maes J, Schaegner J P, Termansen M, et al.  
711 Mapping cultural ecosystem services: a framework to assess the potential for outdoor  
712 recreation across the EU. *Ecological Indicators*; 2014; 45(5): 371-385. [https://doi.](https://doi.org/10.1016/j.ecolind.2014.04.018)  
713 [org/10.1016/j.ecolind.2014.04.018](https://doi.org/10.1016/j.ecolind.2014.04.018).
- 714 25. Ma FJ, Liu JT, Eneji AE. A review of ecosystem services and research perspectives. *Acta*  
715 *Ecologica Sinica*; 2013; 33(19): 5963 - 5972. <https://doi.org/10.5846/stxb201306071398>.
- 716 26. Chen Y, Li JF, Xu J. The impact of socio-economic factors on ecological service value in

- 717 Hubei Province: A geographically weighted regression approach. *China Land Science*; 2015;  
718 29(6):89-96. <https://doi.org/10.13708/j.cnki.cn11-2640.2015.06.012>.
- 719 27. Zhang C, Ren ZY, Gao MX, Yan WH. The forest ecosystem services and their valuation in  
720 Gansu Province. *Journal of Arid Land Resources and Environment*; 2007; 21(8): 147-151.
- 721 28. Wang SL, Liu XD, Wang JH, Li XB, Zhao ZQ. Soil conservation and value assessment of  
722 forest ecosystem in Gansu Province. *Journal of Soil and Water Conservation*; 2011; 5: 35-39.  
723 <https://doi.org/CNKI:SUN:TRQS.0.2011-05-009>.
- 724 29. Guo XN, Qi Y, Wang J, Liu BK, Wang FK, Chen ZH, et al. The research of forest ecosystem  
725 and their valuation of Gansu Province based on remote sensing and GIS. *Remote Sensing*  
726 *Technology and Application*; 2009; 2: 217-222. [https://doi.org/10.11873/j.issn.1004-0323.](https://doi.org/10.11873/j.issn.1004-0323.2009.2.217)  
727 2009.2.217.
- 728 30. Shu C, Zhang LB. Ecosystem service value assessment research based on GIS and remote  
729 sensing technology. *Geomatics & Spatial Information Technology*; 2015; 1: 30-32, 36. <https://doi.org/10.3969/j.issn.1672-5867.2015.01.009>.
- 730
- 731 31. Wang J, Qi Y, Chen ZH. Modeling dynamic assessment on ecosystem services based on  
732 remote sensing technology-A case study on Gansu grassland ecosystem. *Journal of*  
733 *Glaciology and Geocryology*; 2010; 6: 514-521. [https://doi.org/10.3724/SP.J.1226.2010.](https://doi.org/10.3724/SP.J.1226.2010.00514)  
734 00514.
- 735 32. Zhao HY, Chen Y, Yang J, Pei TT. Ecosystem service value of cultivated land and its spatial  
736 relationship with regional economic development in Gansu Province based on improved  
737 equivalent. *Arid Land Geography*; 2018; 4: 851-858. [https://doi.org/10.12118/j.](https://doi.org/10.12118/j.issn.1000-6060.2018.04.22)  
738 [issn.1000-6060.2018.04.22](https://doi.org/10.12118/j.issn.1000-6060.2018.04.22).

- 739 33. De Groot RS, Alkemade R, Braat L, Hein L, Willemen L. Challenges in integrating the concept  
740 of ecosystem services and values in landscape planning, management and decision making.  
741 Ecological Complexity; 2010; 7(3): 260-272. <https://doi.org/10.1016/j.ecocom.2009.10.006>.
- 742 34. MA (Millennium ecosystem assessment). Millennium ecosystem assessment: Living beyond  
743 our means-natural assets and human well-being world resources institute, Washington DC;  
744 2005.
- 745 35. Burkhard B, Krool F, Nedkov S, Müllera F. Mapping ecosystem service supply, demand and  
746 budgets. Ecological indicators; 2012; 21: 17-29. [https://doi.org/10.1016/j.ecolind.2011.06.](https://doi.org/10.1016/j.ecolind.2011.06.019)  
747 019.
- 748 36. Wang J, Wei YM, Sun XY. Effects of excessive grazing on grassland eco-system services  
749 valuation. Journal of Natural Resources; 2006; 21(1): 109-117. [https://doi.org/10.3321/](https://doi.org/10.3321/j.issn:1000-3037.2006.01.014)  
750 [j.issn:1000-3037.2006.01.014](https://doi.org/10.3321/j.issn:1000-3037.2006.01.014).
- 751 37. Jiao L, Zhao CZ. The analysis and evaluation on grassland ecosystem service function value of  
752 Shandan Horse Field in Qilian Mountain National Nature Reserve. Journal of Arid Land  
753 Resources and Environment; 2013; 27(12): 47-52. [https://doi.org/10.3969/j.issn.1003-7578.](https://doi.org/10.3969/j.issn.1003-7578.2013.12.009)  
754 2013. 12. 009.
- 755 38. Li X, Ye YH, Wang YLT, Fu L, Yang MC, et al. Evaluation of grassland resource values in  
756 arid and semi-arid area-A case of Etuoke's grassland resource balance sheet. Journal of Arid  
757 Land Resources and Environment; 2018; 32(5): 136-143. [https://doi.org/10.13448/j.cnki.](https://doi.org/10.13448/j.cnki.jalre.2018.153)  
758 [jalre.2018.153](https://doi.org/10.13448/j.cnki.jalre.2018.153).
- 759 39. Li W, Zhao XS, Cui LJ, Sun BD, Lei YR, Ma QF, et al. Distribution and supply value of  
760 freshwater wetland resources in Jilin Province. Journal of Hydroecology; 2017; 38(1): 10-17.

- 761 <https://doi.org/10.15928/j.1674-3075.2017.01.002>.
- 762 40. Xiao SC, Xiao HL, Lu Q, Li S, Wei H. Evaluation on China desert and sandy land ecosystem  
763 services based on Its related water process and regulating functions. Journal of Desert  
764 Research; 2013; 33(5): 1-9. <https://doi.org/10.7522/j.issn.1000-694X.2013.00180>.
- 765 41. Xue H. Study on ecosystem services of artificial system. Hangzhou: Zhejiang University;  
766 2013.
- 767 42. Zhang XL, Xu ZJ, Zhang ZH, Wu LY. Environment purification service value of urban green  
768 space ecosystem in Qingdao City. Acta EcologicaSinica; 2011; 31(9): 2576-2584. <https://doi.org/10.1111/j.1759-6831.2010.00113.x>.
- 769
- 770 43. Gong W, Ou SH, Yang T, Yi CX. Quantitative evaluation of ecological value of urban green  
771 space based on GIS/RS. Journal of Anhui Agricultural Sciences; 2018; 46(3): 38-43.  
772 <https://doi.org/10.13989/j.cnki.0517-6611.2018.03.016>.
- 773 44. Duan YB, Lei YK, Wu BJ, Peng DD, Tian GX. Evaluation and dynamic study on the  
774 ecological service value for urban green space system in Zhengzhou. Ecological Science;  
775 2016; 35(2), 81-88. <https://doi.org/10.14108/j.cnki.1008-8873.2016.02.013>.
- 776 45. Wang QH, Li JX, Peng Y, Lan WJ. Evaluation of service function of shrub ecosystem in  
777 China. Jiangsu Agricultural Sciences; 2019; 47(4): 233-237. <https://doi.org/10.15889/j.issn.1002-1302.2019.04.053>.
- 778
- 779 46. Cui XH. Valuation of terrestrial ecosystems services and values – A case study of desert  
780 ecosystems in China. Beijing: Chinese Academy of Forestry ; 2009.
- 781 47. Zhao JH. Study on the influence of farmland irrigation mode on groundwater supply in Bayin  
782 River Basin. Xi'an: Chang'an University; 2018.



- 783 48. Xu T, Xu Y, Jiang B, ZhangL, Song WB, Zhou DM. Evaluation of the ecosystem services in  
784 caohai wetland, Guizhou Province. *Acta Ecologica Sinica*; 2015; 35 (13): 4295-4303.  
785 <https://doi.org/10.5846/stxb201403250550>.
- 786 49. Cui LJ, Zhao XS, Li W, Kang XM, Lei YR, Zhang MY, et al. Analysis on groundwater supply  
787 function of wetlands in Jilin Province based on soil permeability coefficient. *Journal of*  
788 *Nature Resources*; 2017; 32(9): 1457-1468. <https://doi.org/10.11849/zrzyxb.20160905>.
- 789 50. Guo LC, Yue P, Li HY, Xiang J, Ge P. Distribution and circular process of water resources in  
790 the arid area of Hexi Corridor. *Agricultural Research in the arid areas*; 2011; 29(6): 157-163.  
791 <https://doi.org/CNKI:SUN:GHDQ.0.2011-06-032>.
- 792 51. Zhang GH, Nie ZL, Wang JZ, Cheng XX. Isotopic characteristic and recharge effect of  
793 groundwater in the water circulation of Heihe river basin. *Advances in Earth Science*; 2005;  
794 20(5), 511-518. <https://doi.org/10.3321/j.issn:1001-8166.2005.05.005>.
- 795 52. Jiang LZ, Yang DY, Mei CC, Ban YC, Yang XM. Ecosystem service function and its value  
796 assessment for urban green space-a case study on Futian District of Shenzhen City. *Journal of*  
797 *HuaZhong Normal University (Natural Sciences)*; 2018; 3: 424-431. <https://doi.org/10.19603/j.cnki.1000-1190.2018.03.020>.
- 798
- 799 53. Cui CW, Xu XG. Ecosystem services assessment of the agricultural lands in Beijing region.  
800 *Ecological Economy*; 2007; 10: 338-340. [https://doi.org/10.3969/j.issn.1671-4407.2007.10.](https://doi.org/10.3969/j.issn.1671-4407.2007.10.093)  
801 093.
- 802 54. Xiao T, Gao YH, Zhai J, Yang M, Sun CX. Study on the value accounting of grassland  
803 ecosystem regulation service-a case study of Maduo County, Qinghai Province. *Chinese*  
804 *Environmental Sciences Association*; 2016; 650-655.

- 805 55. Mo FR, Chu XZ, Ma XF, Ma Q. The windbreak and sand fixation function and its value  
806 assessment of landscape patterns change of Ebinur lake wetland. *Ecological Science*; 2017;  
807 36(6): 195-206. <https://doi.org/10.14108/j.cnki.1008-8873.2017.06.027>.
- 808 56. Zhao JL, Dong ZY, Chang ZF. Ecological compensation of a Desert water-Lifting irrigation  
809 project based on opportunity cost of ecosystem service value: A case study on  
810 Jingtai water-Lifting irrigation project. *Arid Zone Research*; 2019; 3: 743-751. <https://doi.org/10.13866/j.azr.2019.03.26>.
- 811
- 812 57. Wang YK, Guo SX, Wang J, Yuan H, Xu BL, Wang DR. Estimation of forest ecosystem  
813 service value in the Qilian Mountains National Nature Reserve in Gansu of China. *Journal of*  
814 *Desert Research*; 2013; 33(6): 1905-1911. [https://doi.org/10.7522/j.issn.1000-694X.2013.](https://doi.org/10.7522/j.issn.1000-694X.2013.00236)  
815 00236.
- 816 58. Zhang HQ. Evaluation of forest ecosystem service value of Baishuijiang National Nature  
817 Reserve in Gansu Province. Lanzhou: Gansu Agricultural University; 2015.
- 818 59. Li C. Remote sensing estimation and spatiotemporal differentiation of land ecological service  
819 value in coastal saline alkali soil area. Shijiazhuang: Hebei Agricultural University; 2015.
- 820 60. Cheng HT. Evaluation of ecosystem service function of Baisha reservoir in Henan Province.  
821 *Jilin agriculture*; 2019; 14: 28. <https://doi.org/10.14025/j.cnki.jlny.2019.14.006>.
- 822 61. Chen HS. Evaluation of ecosystem service function of Lishimen reservoir in Zhejiang  
823 Province. *Anhui Agricultural Science Bulletin*; 2019; 25(1): 135-136. [https://doi.org/10.3969/](https://doi.org/10.3969/j.issn.1007-7731.2019.01.055)  
824 [j.issn.1007-7731.2019.01.055](https://doi.org/10.3969/j.issn.1007-7731.2019.01.055).
- 825 62. Sun ZL, Li YN, Yu J, Wang FR. Ecosystem service evaluation of the six important reservoirs  
826 in Zhejiang Province. *Journal of Zhejiang University (Science Edition)*; 2015; 42(3): 353-364.

- 827 <https://doi.org/10.3785/j.issn.1008-9497.2015.03.020>.
- 828 63. Kong DS, Zhang H. Economic value of wetland ecosystem services in the Heihe National  
829 Nature Reserve of Zhangye. *Acta Ecologica Sinica*; 2015; 35(4): 972-983. [https://doi.org/10.](https://doi.org/10.5846/stxb201305141053)  
830 5846/stxb201305141053.
- 831 64. Jiang B, Chen YY, Rao EM, Zhang L, Ouyang ZY. Final ecosystem services valuation of  
832 Bosten Lake. *Chinese Journal of Ecology*; 2015; 34(4): 1113-1120.
- 833 65. Cheng Y, Liu PX, Bai Y, Ma YL, Pan JY. Analysis of temporal and spatial variation, driving  
834 factors and trend prediction of grain yield in Gansu Province. *Agricultural Research in the*  
835 *Arid Areas*; 2009; 27(4): 225-229.
- 836 66. Zhu ZG, Wang DY, Zhu LH, Hao YL. Correlation analysis farmland quality standard grain  
837 yield Binzhou City. *Shandong Land Resources*; 2015; 31(1): 75-79. [https://doi.org/10.3969/](https://doi.org/10.3969/j.issn.1672-6979.2015.01.019)  
838 [j.issn.1672-6979.2015.01.019](https://doi.org/10.3969/j.issn.1672-6979.2015.01.019).
- 839 67. Wang YB, Hu YL, Bu CY, Mi, CL. Research on arable land grade characteristics and spatial  
840 distribution in Gansu Province. *Chinese Journal of Agricultural Resources and Regional*  
841 *Planning*; 2017; 38(11): 138-144. <https://doi.org/10.7621/cjarrp.1005-9121.20171119>.
- 842 68. Zhang R, Yang H, Meng XJ, Wu HJ. Monitoring and evaluation on pratacultural status in  
843 Gansu. *Grassland and Turf*; 2017; 37(1): 1-7. [https://doi.org/10.3969/j.issn.1009-5500.](https://doi.org/10.3969/j.issn.1009-5500.2017.01.001)  
844 2017.01.001.
- 845 69. Tang HP, Tang SQ. Traits of water resources in Gansu Province and its conservation and  
846 utilization. *Journal of Desert Research*; 2000; 20(2): 213-216. [https://doi.org/10.3321/j.](https://doi.org/10.3321/j.issn:1000-694X.2000.02.021)  
847 [issn:1000-694X.2000.02.021](https://doi.org/10.3321/j.issn:1000-694X.2000.02.021).
- 848 70. Padmavalli R. Utilisation of Major Natural Resources, in Proc. Symposium resources

- 849 development and planning. Geography Dept, Madras Univ; 1976; 1-19.
- 850 71. Zhang K. The influence of deforestation of tropical rainforest on local climate and disaster in  
851 Xishuangbanna region in China. Climatological Note; 1986; 35, 223-236. <http://ir.xtbg.org.cn/handle/353005/4886>.
- 852
- 853 72. Balling, Robert C. The impact of summer rainfall on the temperature gradient along the united  
854 states-mexico border. Journal of Applied Meteorology; 1989; 28(4): 304-308. [https://doi.org/10.1175/1520-0450\(1989\)028<0304:TIOSRO>2.0.CO;2](https://doi.org/10.1175/1520-0450(1989)028<0304:TIOSRO>2.0.CO;2).
- 855
- 856 73. Meher-Homji VM. Probable impact of deforestation on hydrological processes. ClimChande;  
857 1991; 19: 163-173. <https://doi.org/10.1007/bf00142223>.
- 858 74. People's Government of Gansu Province. The scope of groundwater over mining area,  
859 forbidden mining area and restricted mining area. [http://www.gansu.gov.cn/art/2016/1/14/art\\_4785\\_261126.html](http://www.gansu.gov.cn/art/2016/1/14/art_4785_261126.html); 2016.
- 860
- 861 75. Xie GD, Xiao Y, Zhen L, Lu CX. Study on ecosystem services value of food production in  
862 China. Chinese Journal of Eco-Agriculture; 2005; 13(3), 10-13. <https://doi.org/CNKI:SUN:ZGTN.0.2005-03-003>.
- 863
- 864 76. Duan RJ, Hao JM, Zhang JX. Land utilization and changes on eco-service value in different  
865 locations in Beijing. Transactions of the Chinese Society of Agricultural Engineering; 2006;  
866 22(9): 21-28. <https://doi.org/10.1111/j.1744-7917.2006.00098.x>.
- 867 77. Wang SL, Liu XD, Wang JH, Li XB, Jin M, Zhang XL. Evaluation on forest ecosystem  
868 services value in Gansu province. Journal of Arid Land Resources and Environment; 2012; 3:  
869 139-143. <https://doi.org/10.1007/s11783-011-0280-z>.
- 870 78. Qi ML. Land use change and influence to ecological service in Gansu Province. Journal of

871 Anhui Agricultural Sciences; 2010; 38(20): 10814-10817. [https://doi.org/ 10. 3969/ j.issn.](https://doi.org/10.3969/j.issn.)

872 0517-6611. 2010.20.126.

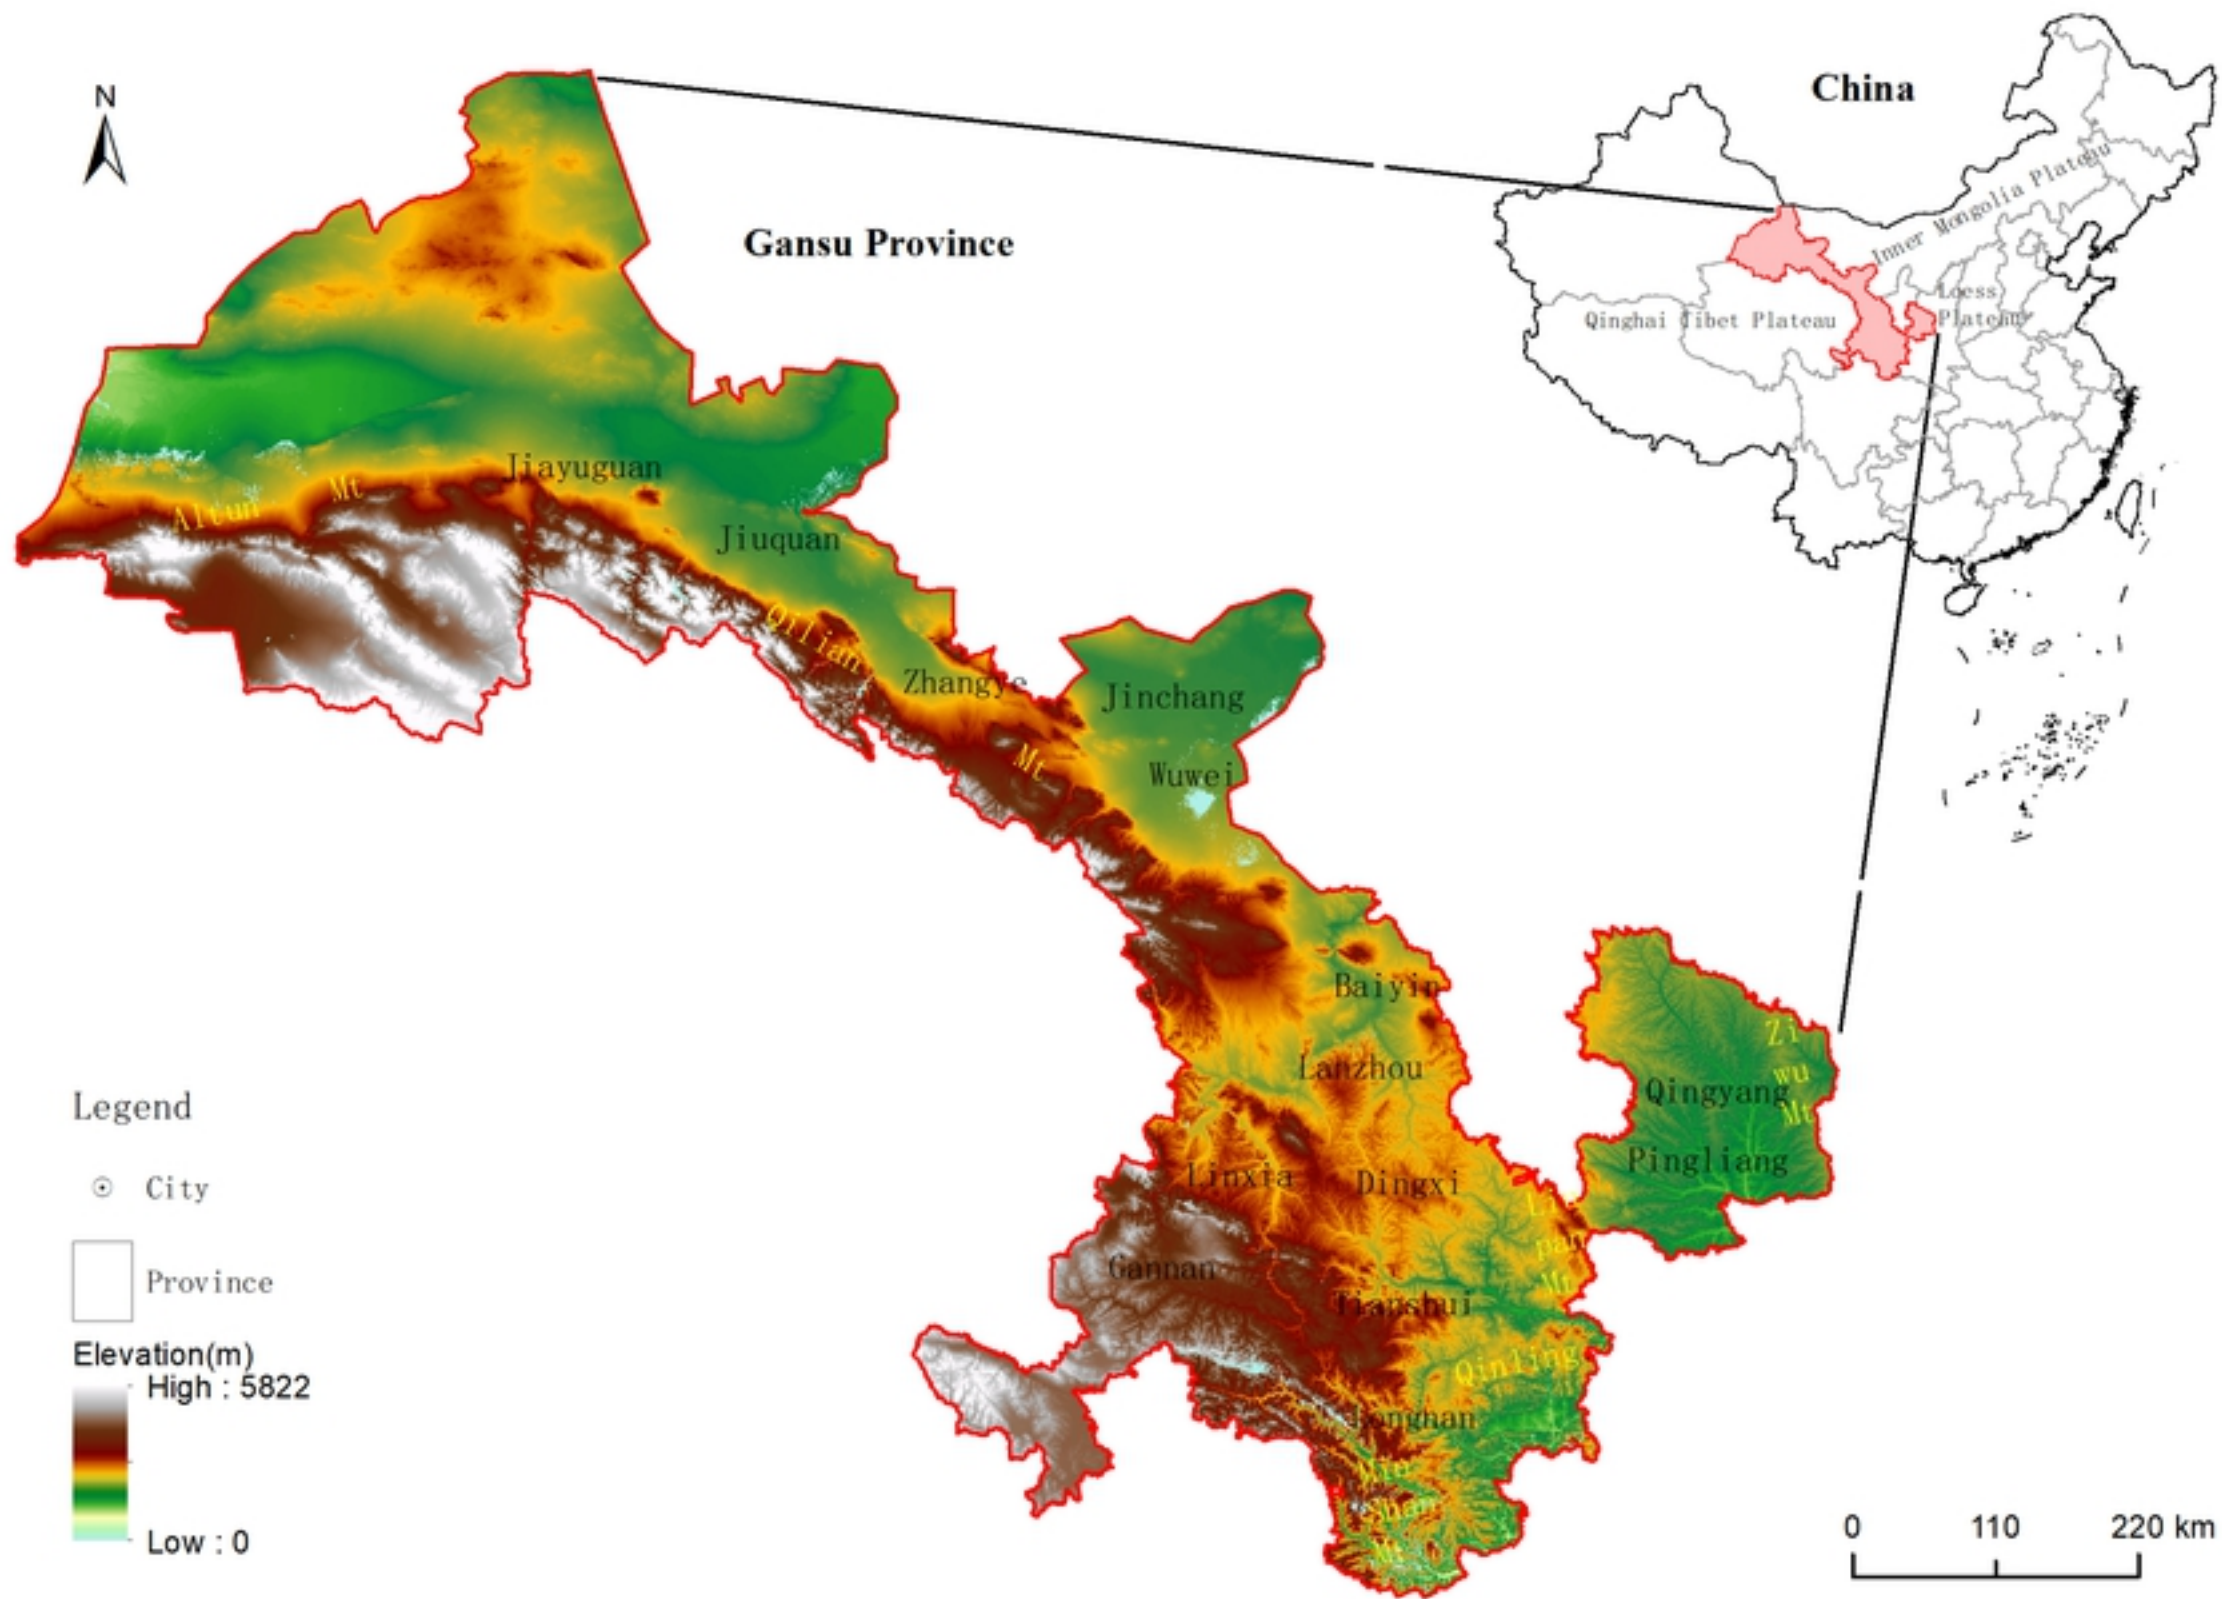

Figure

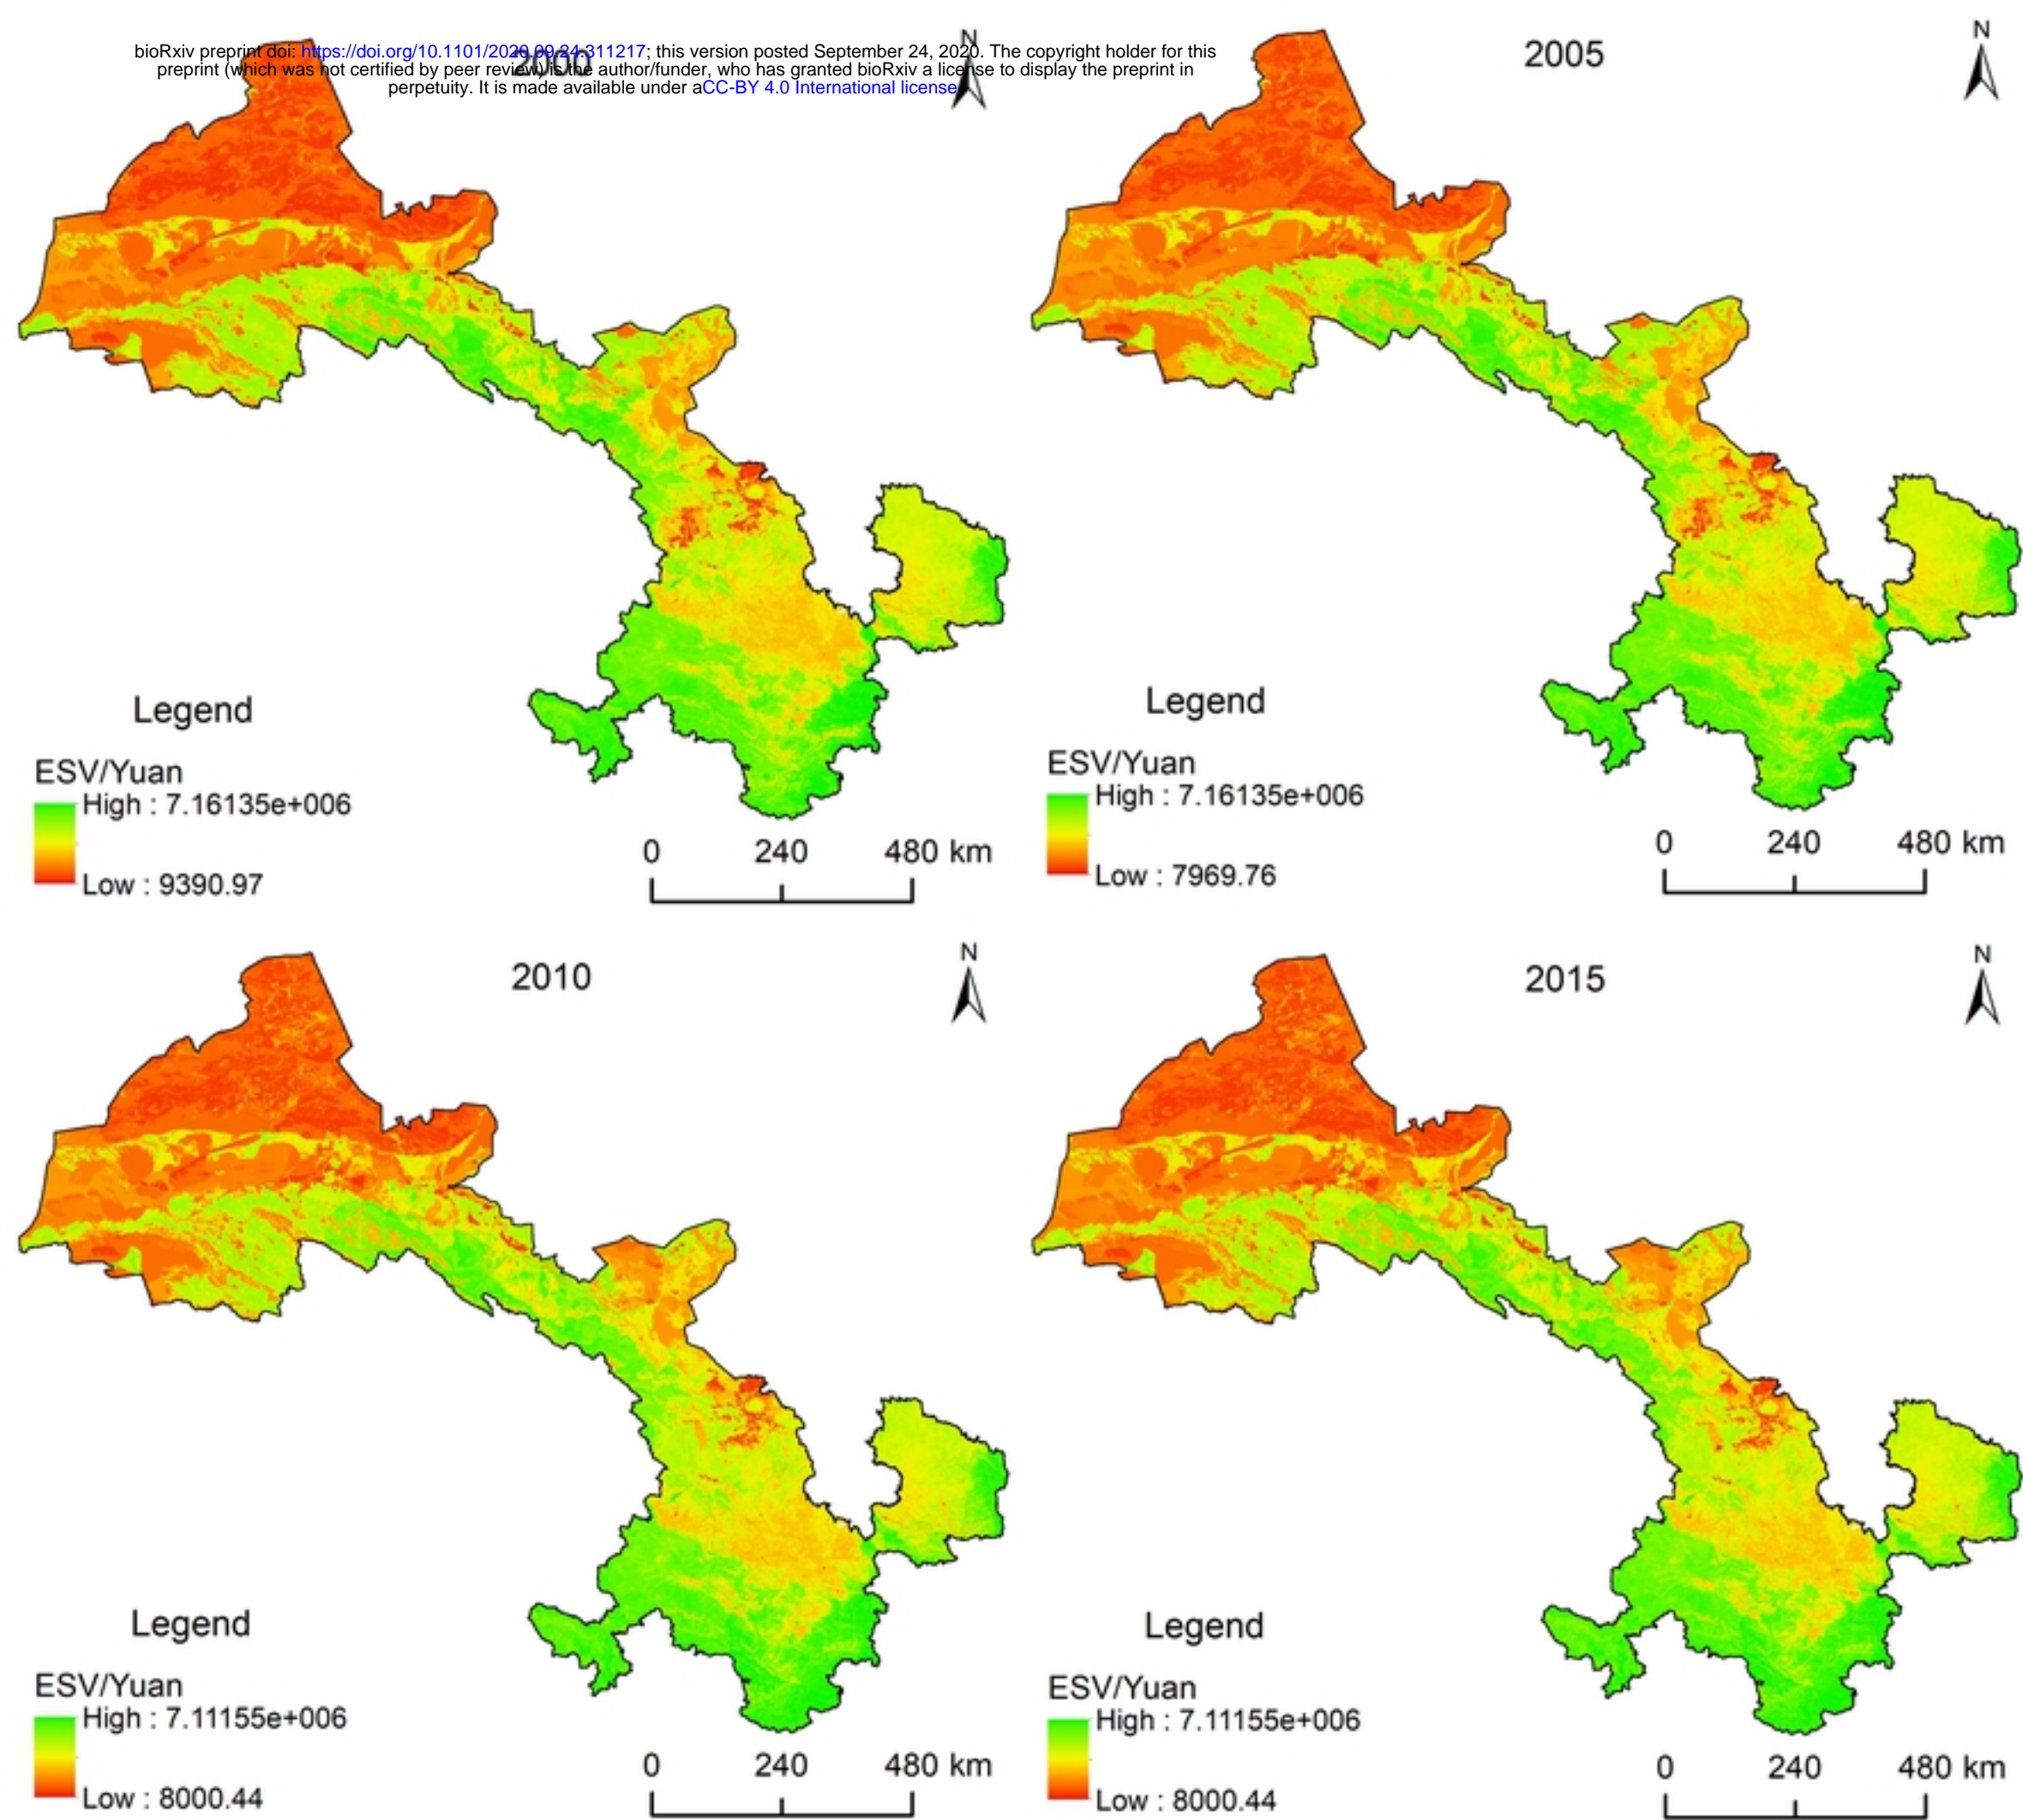

Figure

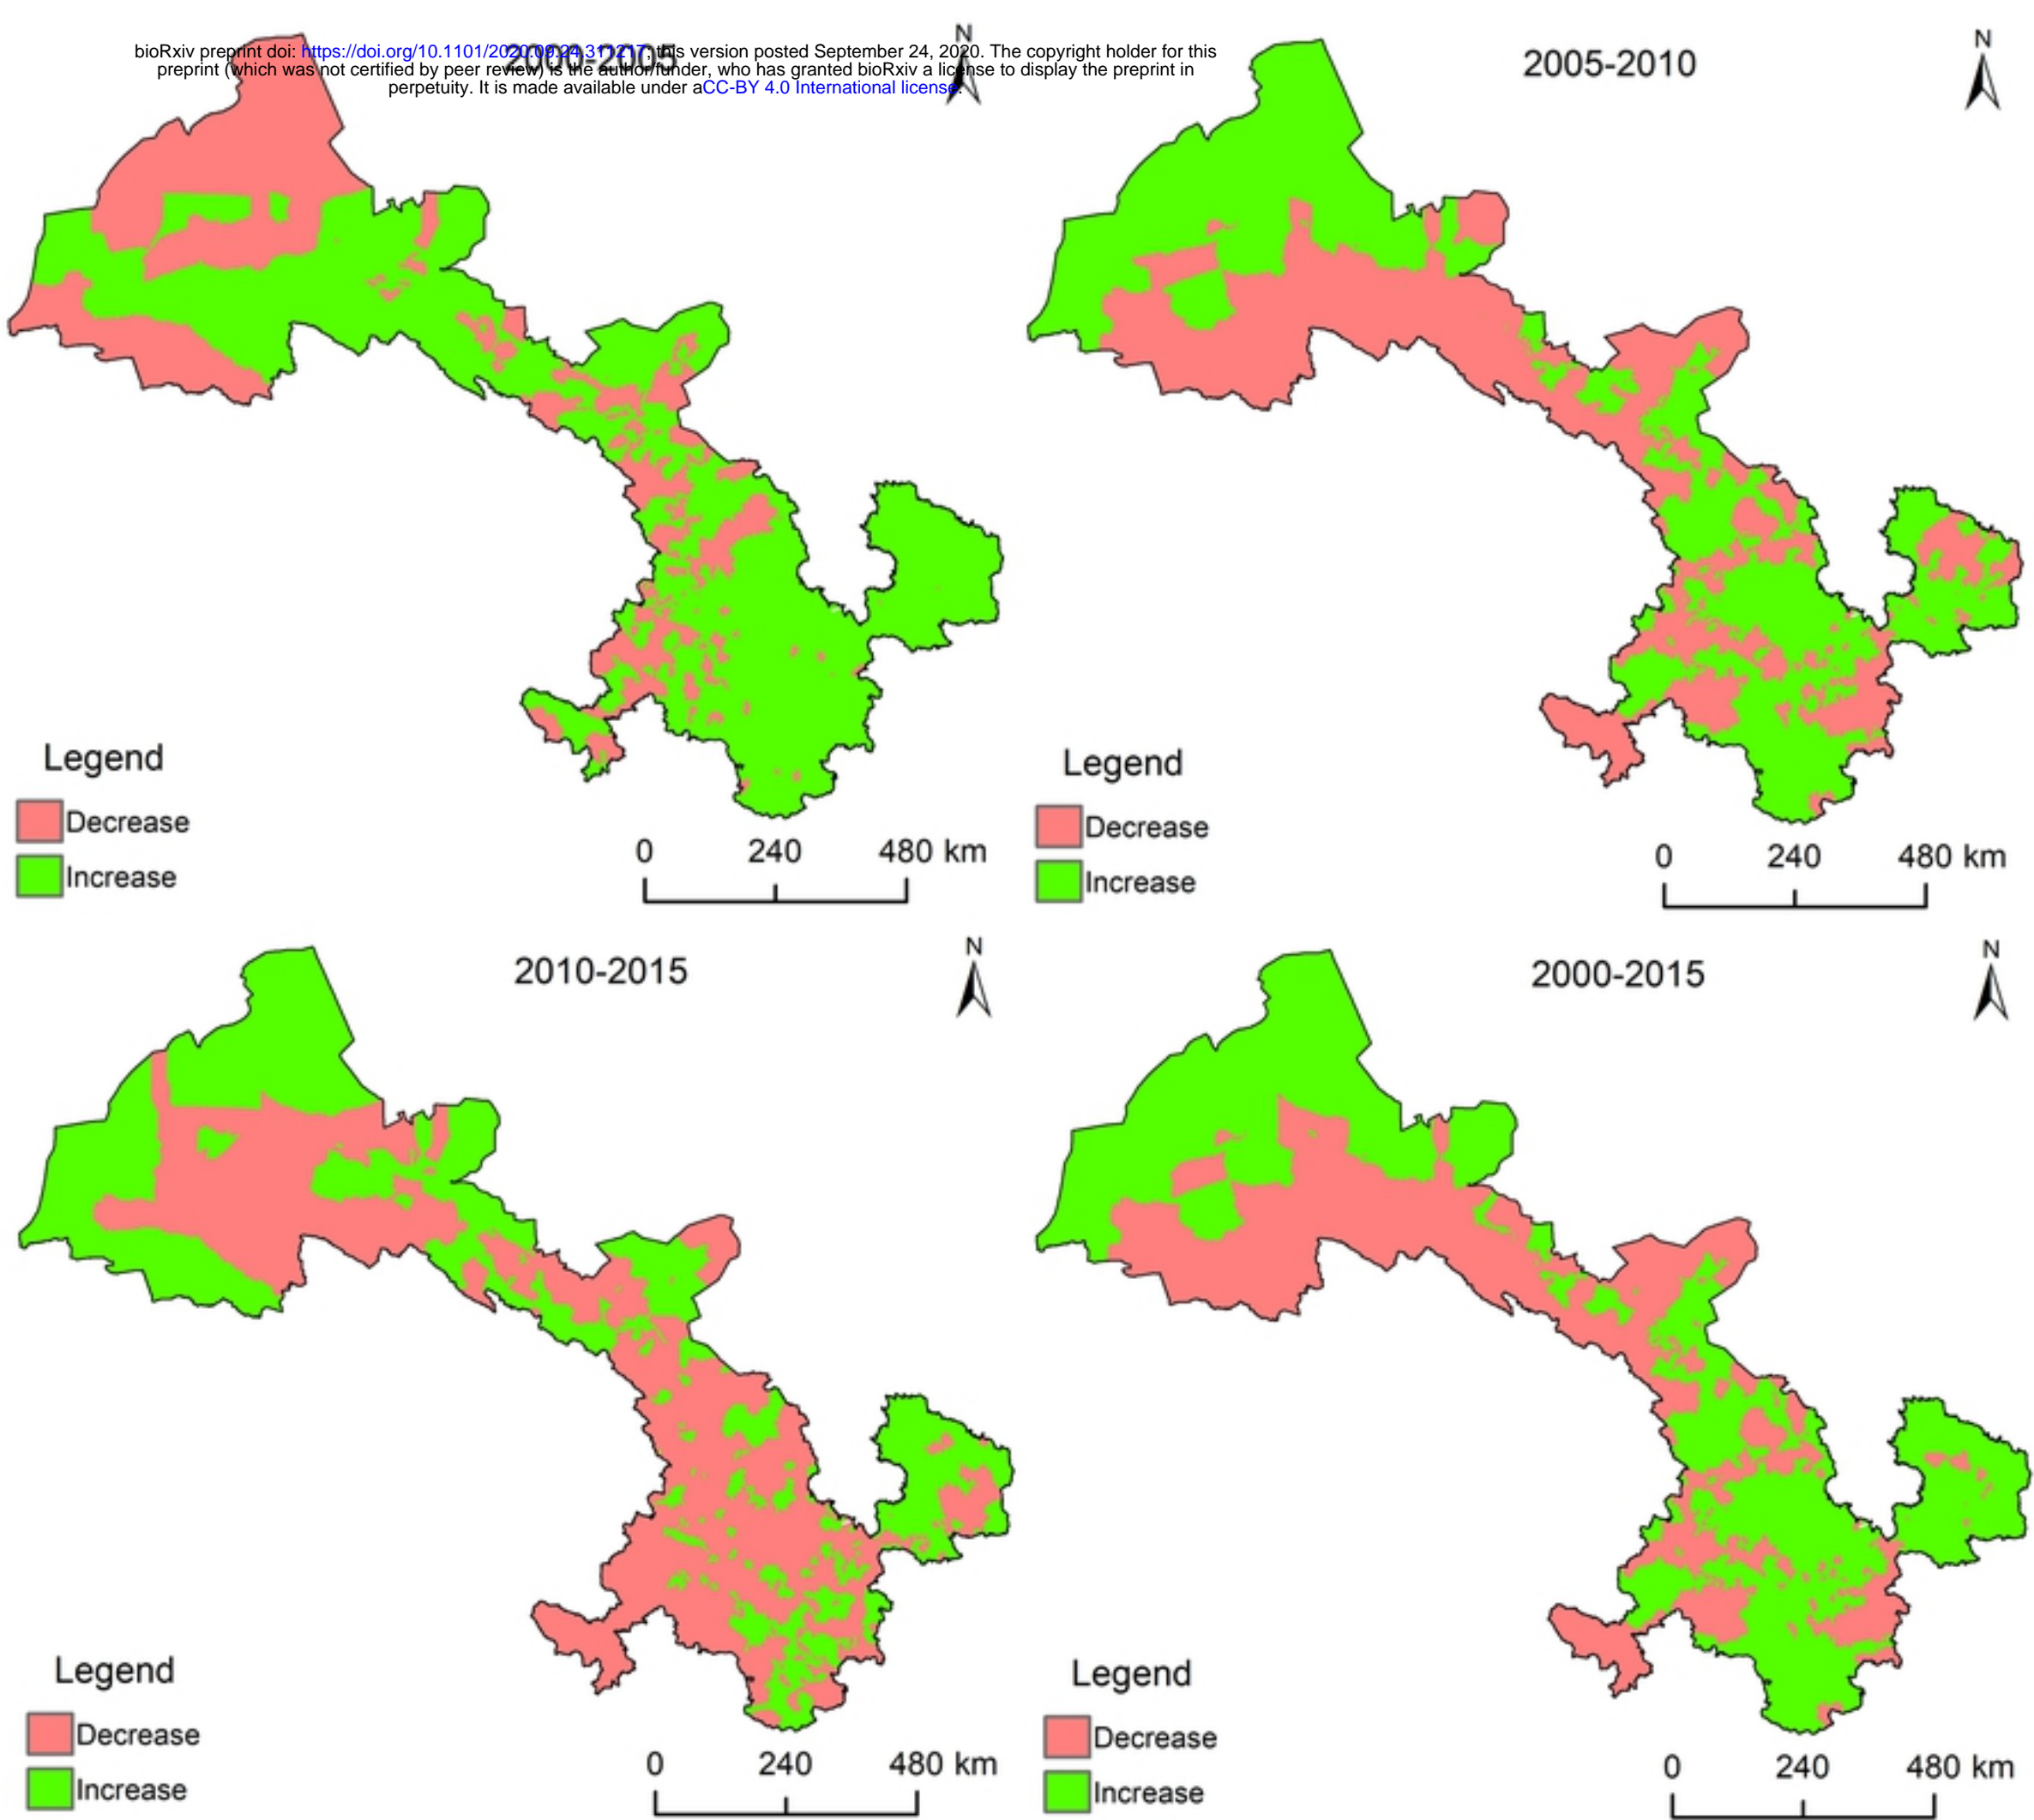

Figure



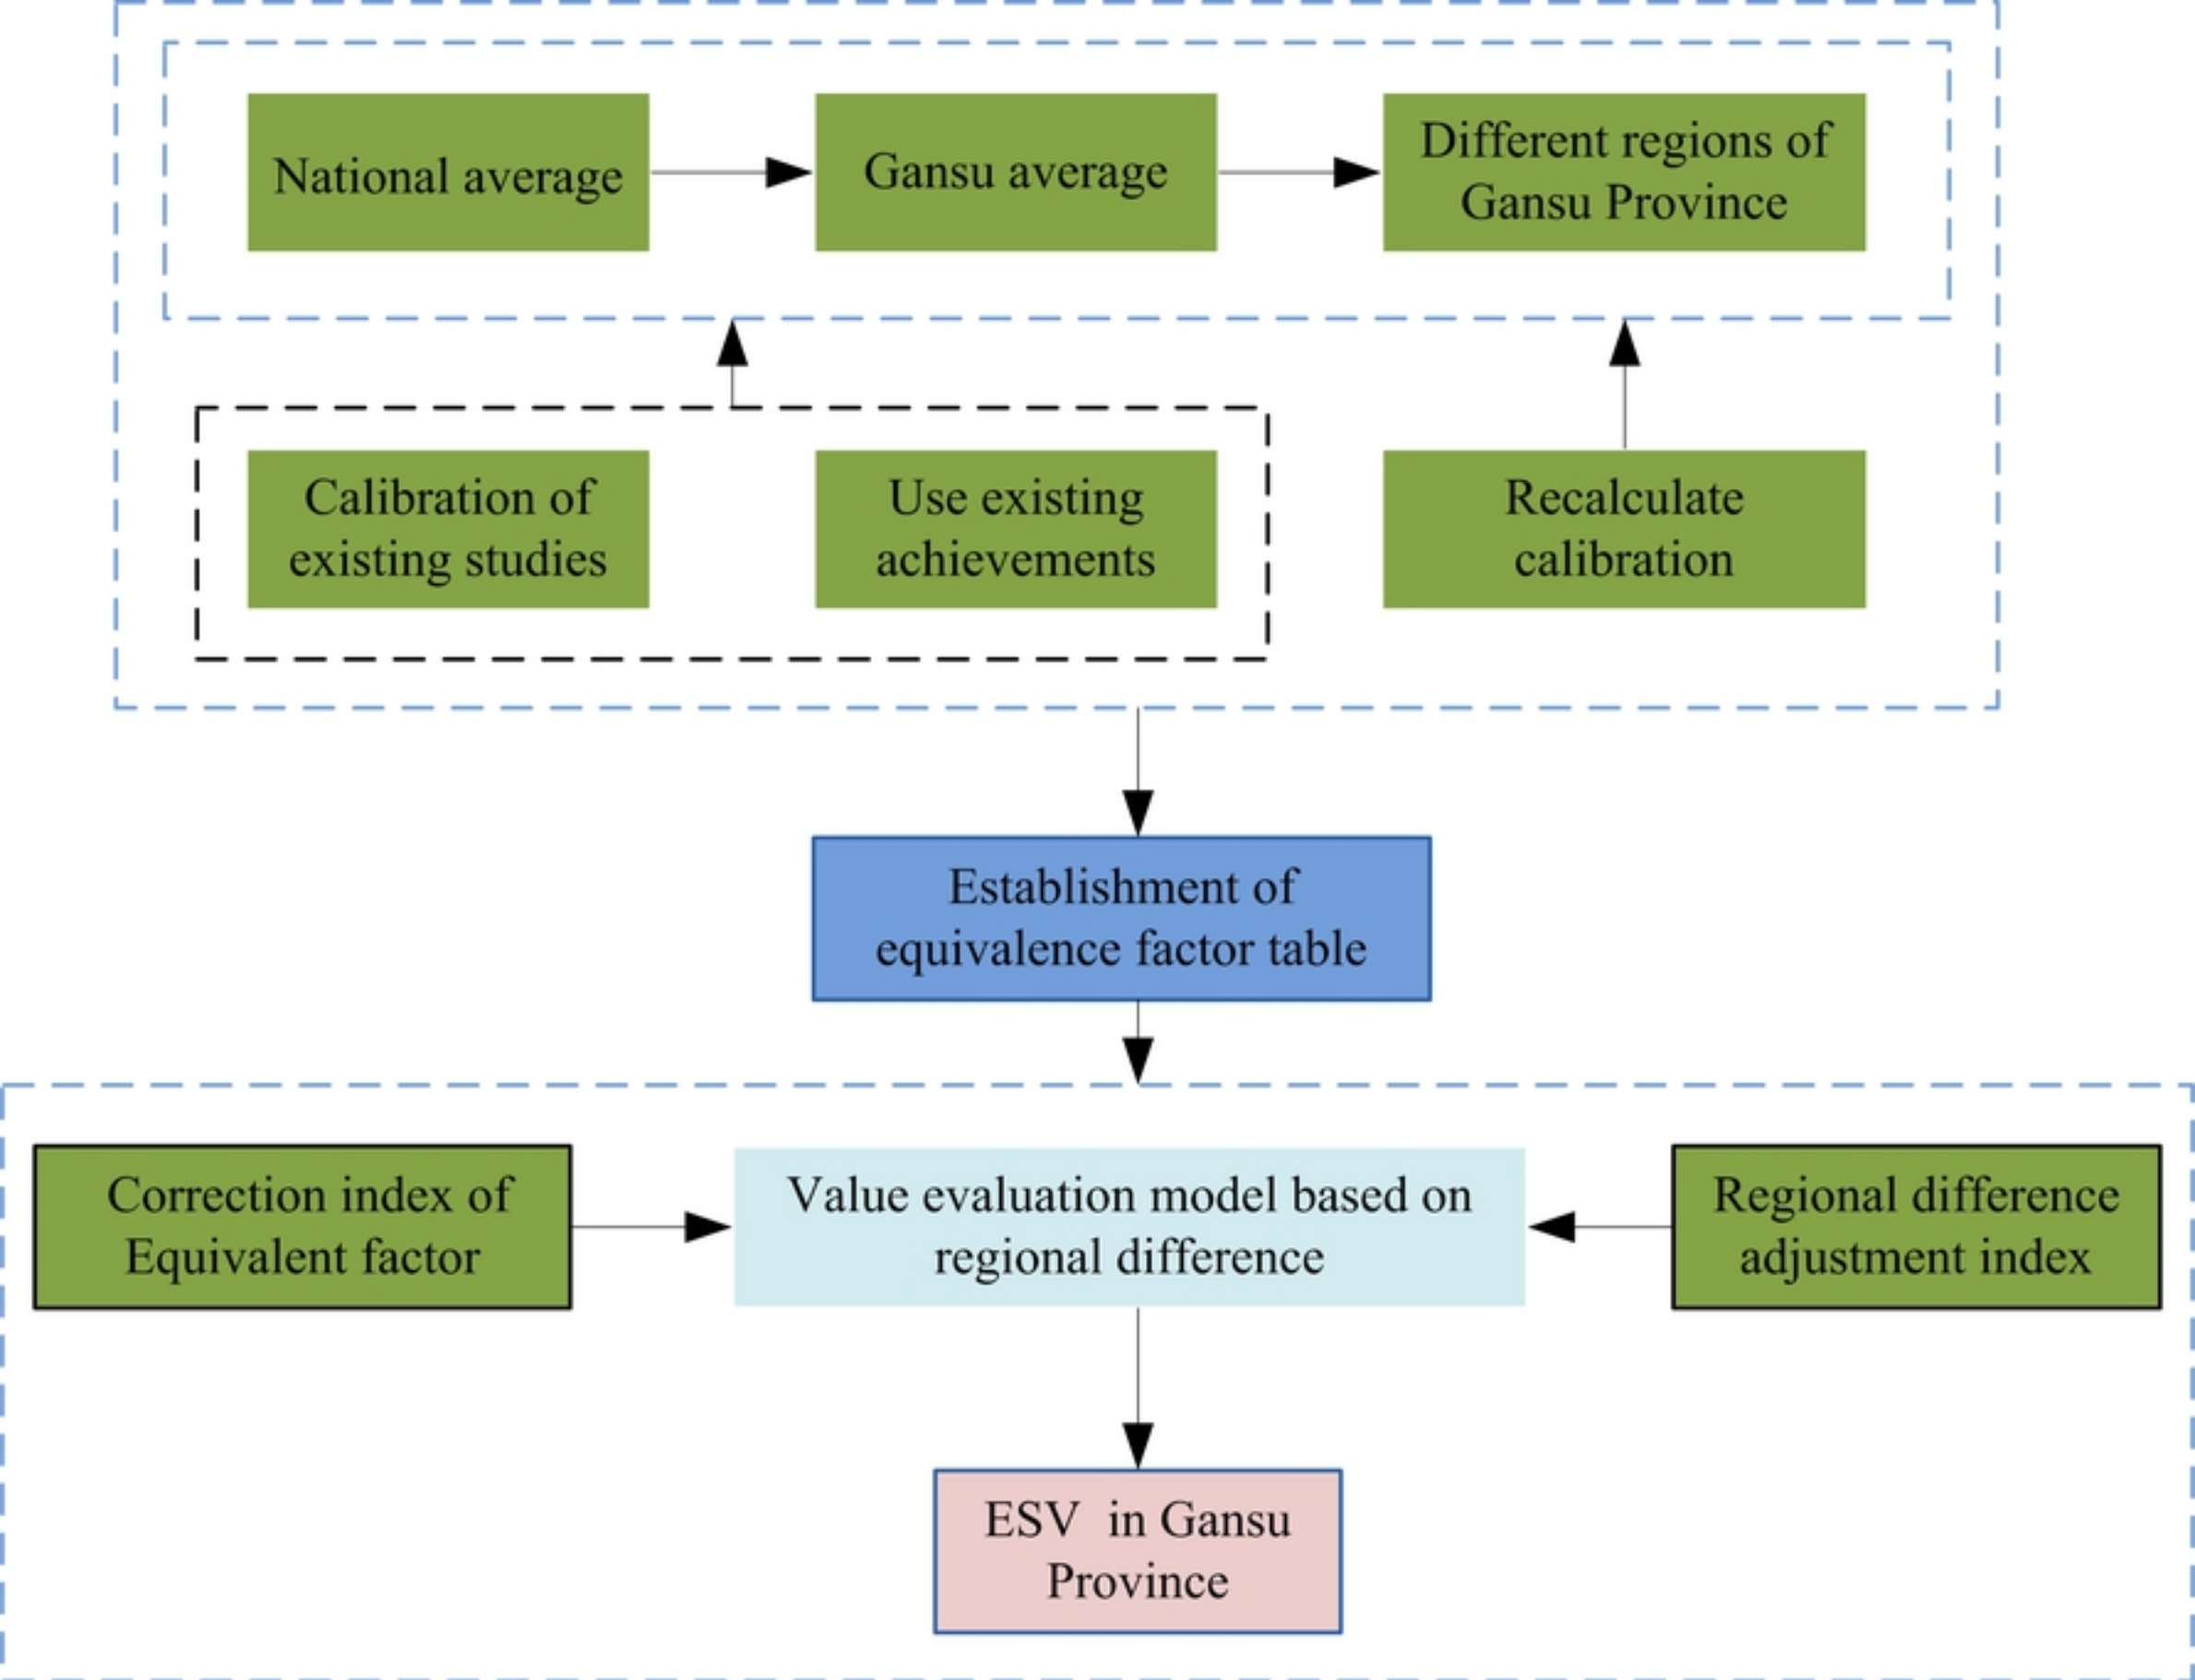

Figure
